# Supplementary material for: Phylogenetic signal analysis in the basicranium of Ursidae (Carnivora, Mammalia)
Source: PeerJ. 2019 Mar 15;7:e6597. doi: 10.7717/peerj.6597 (PMC6422017; doi:10.7717/peerj.6597)
Supplement: Table S2 [file peerj-07-6597-s005.xlsx]

## Sheet: Hoja1
Table S2- PCscores reported by Arnaudo and Fernandez Blanco (2016),
	taxa	number	family	PC1	PC2	PC3	PC4	PC5	PC6	PC7	PC8	PC9	PC10	PC11	PC12	PC13	PC14	PC15	PC16	PC17	PC18	PC19	PC20	PC21	PC22	PC23	PC24	PC25	PC26	PC27	PC28	PC29	PC30	PC31	PC32	PC33	PC34	PC35	PC36	PC37	PC38	PC39	PC40	PC41
	A_angustidens	14	Tremarctinae	-0.0698457	-0.021912	-0.0125385	0.0196615	0.0092354	-0.0221701	-0.0110677	0.00829467	0.0268882	-0.00585628	-0.0325531	0.00503063	-0.00441081	0.00901945	0.0114387	0.012496	-0.00895862	0.00536829	-0.00403152	0.00367149	0.00733393	0.0017334	6.38633e-05	-0.00172347	-0.0036042	0.00275925	-0.000135305	-0.000398186	-0.00820777	-0.000139022	0.000354298	-0.00178474	0.0012692	-0.00316805	-0.00163931	0.000470921	0.00450912	-0.00337885	-0.00510836	-0.000149797	-0.000629167
	A_angustidens	18	Tremarctinae	-0.0696813	-0.00067365	0.00238687	0.00446094	-0.0158201	-0.0101624	0.00444789	0.0326328	0.0220804	0.0116406	-0.0119446	-0.0136782	-0.00470871	-0.000263074	0.00871268	0.0207264	-0.00237173	0.0183334	0.00479399	0.0127662	0.00647626	0.000941696	-0.0226326	0.0112209	0.00477768	0.00781064	-0.00390468	-8.16483e-05	0.000369086	-0.0104474	0.00475439	0.00680865	-0.00293233	0.000862462	0.000518135	0.00391447	0.00102245	-0.000589628	0.00567863	0.00326414	-0.000206841
	A_angustidens	11	Tremarctinae	-0.0787787	-0.0138649	0.0394299	0.0203359	-0.00938054	-0.0512715	0.0560165	-0.0017627	-0.0133617	-0.00767965	2.92264e-05	-0.0249783	0.022228	-0.00213523	-0.00162157	0.00918491	-0.00487565	-0.0132573	0.00708609	0.00431805	-0.0010203	-0.00451792	-0.00583121	0.00442226	-0.00699201	-0.0036875	0.0042269	0.00343994	-0.00583783	-0.00838618	-0.00233785	-0.00429468	-0.0028989	-0.00748409	0.00404406	-0.00352645	0.00468649	-0.00260887	0.000827509	-0.00801083	-0.00578275
	A_angustidens	12	Tremarctinae	-0.0827745	0.0113072	-0.019978	-0.00685912	-0.0176137	-0.00979656	0.0134926	0.00556577	-0.00582847	-0.000247772	0.000485161	-0.0043962	0.00662166	0.0113149	-0.00421418	0.00132894	-0.00648034	-0.00909419	-0.00597666	-0.0112235	-0.0183889	0.00546883	0.00163089	0.00321564	-0.00606176	0.00099006	0.00496212	0.00420005	0.00218796	-0.00271167	0.00376392	0.00384834	-0.00110521	0.00186158	0.00452986	-0.00268354	-0.00280549	-0.000812213	-0.00177652	0.00143117	0.00112768
	A_angustidens	17	Tremarctinae	-0.0705041	0.00733443	-0.0223417	0.0347327	-0.00194276	0.0137195	-0.0241476	-0.0222256	0.0281863	0.0325939	0.00316115	-0.0278092	-0.0113642	-0.0089823	0.0178174	-0.0078656	0.00419454	-0.00588749	-0.00273885	0.00787752	-0.000929404	0.00679297	-0.00805948	-0.00994874	-0.0119302	0.0025229	-0.00690295	0.0039814	-0.00670424	-0.00585787	0.000893292	0.000550071	-0.00443409	0.0077021	-0.00266409	0.000430067	-0.00193922	0.000410544	0.00131547	8.26596e-05	-0.00110417
	A_melanoleuca	84	Ailuropodinae	-0.163688	-0.0183077	-0.0368152	-0.0624447	0.00415187	-0.0372487	-0.00208341	-0.0227812	0.00928025	0.0109738	0.00908647	0.00644333	0.00534503	-0.00572053	-0.00510988	-0.00180991	0.00483353	-0.00310434	-0.000472167	0.0023422	-0.00074979	0.00777877	-0.00375278	-0.00422698	0.00810636	-0.000329875	-0.00326721	-0.010727	0.00201078	-0.000322941	0.0003928	0.00329799	-0.00128738	-0.0021545	0.000928169	0.00245347	-0.00159024	0.000313957	-0.00402952	0.00027336	-0.00200667
	A_melanoleuca	85	Ailuropodinae	-0.160965	-0.101688	0.00848139	0.00340541	0.0358493	-0.00935084	0.0164407	0.0165341	-0.00704337	-0.0122335	0.0196163	0.00933713	-0.0112712	-0.016053	-0.0160086	-0.0189	-0.00591378	0.00815095	0.00731119	-0.00192639	-0.00286341	-0.00260696	-0.00643206	-0.0128895	0.0084997	-0.00325351	0.00128493	-0.00118233	-0.00369281	0.00446542	-6.43101e-05	-0.00180514	-0.0048439	0.00345656	-0.00436455	0.0017174	-0.00028155	-0.000638073	0.00479025	-0.00264499	0.0022701
	A_melanoleuca	87	Ailuropodinae	-0.164419	-0.00997617	-0.0471566	-0.0383614	0.0158996	-0.0136407	-0.00159956	0.00497376	-0.00820267	0.0110482	0.0134652	0.000228375	-0.000440575	-0.00349982	-0.00964041	0.00102894	0.0196457	-0.00059748	-0.00468819	-0.0052195	0.00723017	-0.000707222	0.000620818	-0.00593428	0.00173462	0.00451398	-0.00440934	0.00257262	0.00313329	0.00300217	0.00911955	0.00172907	-0.0038796	-0.000121133	0.00361464	-0.00151901	0.00188889	-0.000739596	0.000484403	-0.00037823	0.000703983
	A_melanoleuca	149	Ailuropodinae	-0.155921	-0.0768814	0.00484532	-0.0369945	0.0148413	-0.00596925	-0.0149268	-0.0015868	0.00269947	-0.0163107	-0.000898003	-0.0155604	-0.00193842	-0.0184479	-0.0191676	-0.0139384	0.00511932	0.00526341	-0.0250592	0.0240898	0.00257665	0.00966887	-0.00227249	0.0208114	0.000258073	-0.0045793	0.00687972	-0.000268572	0.00628399	-0.00178946	-0.00217089	0.000551131	0.00358184	0.000604163	0.00574056	-0.00156056	-0.00212258	0.00382877	0.000190593	-0.00237249	-0.000566887
	A_melanoleuca	159	Ailuropodinae	-0.12564	-0.107799	-0.00670952	-0.0101378	0.0332305	0.0017512	-0.00802004	-0.00653757	-0.00293451	-0.0185253	0.00555402	-0.0218079	-0.0181947	-0.00520264	-0.0177493	-0.010076	-0.0184912	-0.00208768	0.00772361	0.0116398	0.000689541	0.00962478	0.00283005	-0.0049469	-0.00105829	-0.000258551	-0.00823578	0.00349228	0.00116318	-0.00394902	0.00505191	-0.00498765	0.00502435	0.00403068	-0.00207805	-0.00198647	0.00456102	-0.00187374	-0.00137954	0.00244896	-0.00219509
	A_melanoleuca	78	Ailuropodinae	-0.157524	-0.049792	-0.0524179	-0.0262541	0.0149574	0.0325847	0.00351899	0.000399912	0.00701869	-0.00186229	0.00106511	0.00312763	-0.0115984	0.00113706	0.0115513	0.00016731	0.00867583	-0.00192602	0.0084809	0.000173957	0.00799169	-0.00430265	0.0113413	0.00253479	0.00117976	0.000418764	0.00573474	-0.00604823	0.0016625	-0.000933559	-0.00502599	0.00112052	-0.00425132	-0.00326128	-0.000302449	0.0019231	0.000866562	0.0014711	0.00199131	0.00332998	0.00374228
	A_melanoleuca	81	Ailuropodinae	-0.185486	-0.0613112	-0.0094775	-0.029427	0.0056101	0.024816	-0.00204814	0.016016	-0.00142149	0.00131761	0.00293439	-0.0147852	0.00408422	0.00427842	0.00776015	0.0103466	-0.000148416	0.0131941	-0.00596931	-0.00497538	-0.00765933	-0.016176	-0.00379802	-0.00773258	-0.0072602	-0.0109194	0.000515638	-0.00217985	0.00301674	-0.00592377	-0.00272563	-0.00115011	-0.00462031	-0.00580063	-0.00165141	0.000625761	-0.000960971	-0.00176082	-0.00382662	-0.000349881	0.00558909
	A_melanoleuca	82	Ailuropodinae	-0.157337	-0.0509192	-0.0679645	-0.0431197	0.0202591	0.0227113	0.00997439	-0.00538083	0.00829815	0.0189787	-0.00724965	-0.00497286	0.0069647	-0.00520912	0.00250033	0.00294568	0.00785718	-0.00214101	0.00437014	-0.00315881	0.000240262	-0.00561132	0.00195384	-0.000942904	0.00409777	-0.00706656	-0.00355779	-0.00490855	-0.00163656	0.003384	5.894e-06	0.00430728	0.000401046	-0.00178818	-0.00305308	0.00167415	-0.00031318	0.00341486	-0.000597101	0.000579294	-0.00349194
	A_melanoleuca	83	Ailuropodinae	-0.225025	-0.0653043	-0.0314719	-0.0637128	-0.0249748	0.0390372	0.00402797	-0.0349631	-0.00489265	-0.00219777	-0.00506562	-0.000791314	0.00243472	0.0150833	-0.00118643	0.0180991	-0.0159666	0.00254017	0.00260581	-0.00079709	-0.011229	0.000718918	0.00148635	0.00484514	0.0036238	0.00157648	-0.00451304	0.00799161	-0.00565612	-0.000457746	-0.00341804	-0.00282702	0.000150806	0.00087184	0.00453678	0.00410857	0.000206646	-0.00567136	0.00323515	-0.00982389	0.00216818
	A_melanoleuca	148	Ailuropodinae	-0.155627	-0.0433133	-0.0407534	-0.0281008	0.0176114	-0.0241029	-0.00193737	0.0179696	0.00257834	0.00700191	-0.000741288	-7.45748e-05	-9.37989e-05	0.00107378	0.0124164	-0.000946782	0.0100207	0.0041485	0.00206193	-0.0160231	0.00136463	0.00165802	0.0022668	0.000293259	-0.00611472	0.000951523	-0.00348334	0.00818107	0.00318245	0.00536456	-0.00367887	-0.00276515	0.00694598	0.000243382	-0.000450726	-0.00292817	-0.00214748	-0.00116993	0.00275145	-0.00182545	0.000775816
	A_melanoleuca	168	Ailuropodinae	-0.172415	-0.0360437	-0.0508399	-0.0494963	0.0172569	-0.0126974	0.00566402	0.0113903	-0.00322194	0.00832721	0.00169544	0.00220581	-0.00749568	0.0102818	0.00424192	6.16467e-05	0.0110288	-0.0126644	0.00580172	-0.00297238	0.00922533	0.00620926	0.00147063	0.00481077	0.00120494	-0.00137186	0.00556513	-0.00260176	-0.00389692	0.00285143	-0.00666067	-0.00317285	0.00560449	-0.00159585	-0.00513062	0.00122244	7.30115e-05	0.00157287	0.000258728	-0.00170773	-0.00025371
	A_simus	6	Tremarctinae	-0.0926459	0.00830331	-0.0219526	0.0112092	-0.0159967	-0.00222572	0.00166468	0.0295974	-0.0100601	-0.00567991	-0.0094793	0.000940533	0.0120928	0.0107239	0.000928173	0.0069575	-0.0175562	-0.00734714	-0.0169255	0.000517079	0.00997092	-0.00440092	0.00238008	-0.00242028	0.00394492	0.00102116	0.0056125	-0.00274887	0.00237963	-0.0079327	-0.0012532	0.00432177	0.000124264	-0.00186009	-0.00591662	0.00207978	-0.00178087	-0.00388484	-0.00254887	0.000841119	0.00130321
	A_tarijense	19	Tremarctinae	-0.0233674	-0.0396881	0.0281314	0.00247131	0.00786747	-0.0119348	0.00756145	0.0246297	-0.00891196	0.00535818	0.00536578	0.0238064	0.0159109	0.015657	0.000194677	0.00456166	-0.0145451	-0.00443796	-0.0142897	-0.00707429	0.00833546	-0.00555204	-0.00488629	-0.00115821	-0.010842	0.00821783	0.00889976	0.00320201	0.00062236	-0.00322105	-0.000921184	-0.000429173	0.0032936	-0.000976128	0.00494866	0.00280411	0.00306159	0.00255079	0.00235993	0.000873472	-0.000594296
	A_vetustum	16	Tremarctinae	-0.0570688	-0.0152495	0.0349272	0.0145911	-0.0212377	-0.00641809	-0.0297705	0.0258195	-0.0215491	0.0197274	0.000481107	-0.0174223	0.0441971	0.000902389	-0.017279	0.00951674	0.00343133	-0.0133837	0.00847853	-0.000214726	-0.00711558	0.00144434	0.00723177	-0.0213807	0.00778224	0.00325483	-0.00858014	-0.00615741	-0.00465838	0.00455507	-0.0013134	0.00498158	-0.00498668	0.000602882	-0.00223785	-0.00119838	-0.00103704	0.00680825	0.00210057	-0.000555401	0.00140832
	A_wingei	170	Tremarctinae	-0.0674106	-0.015625	0.03391	0.00881296	0.019439	-0.0253199	0.0103975	0.0196205	-0.00455542	-0.0290632	-0.00808131	0.00217914	0.00419698	0.00515714	0.00935956	-0.0044226	0.0118414	-0.026012	0.00911859	-0.00214952	0.00592374	-0.00318483	-0.00235163	0.00825647	0.00846183	0.00579342	-0.00111617	0.00327748	0.000196022	0.00215033	0.00424618	-0.00609344	-6.94583e-05	0.00517974	0.00157379	-0.000652499	-0.0028085	-0.000247781	-0.000975105	-0.000661986	0.0055729
	H_malayanus	34	Ursidae	-0.0117918	-0.0173111	0.0562751	-0.00843921	0.0246431	0.010538	-0.00177599	-0.0190534	-0.0149183	0.0172487	-0.0021528	0.0178518	0.00142246	-0.0199754	0.01039	-0.0109536	0.00917609	0.00678326	-0.00124505	-0.00094555	0.015155	-0.00886664	0.00294963	0.0121093	0.00440496	0.0137032	0.00716602	0.0061911	0.000613113	-0.00520973	-0.00372232	0.000989139	0.00260525	-0.00164784	-0.00082832	-0.00491713	-0.000211504	0.00109515	0.00105952	0.00011928	0.00119485
	H_malayanus	104	Ursidae	0.0014346	-0.0122968	0.0554852	-0.0195102	0.0414098	0.00969448	-0.00666416	-0.00625002	-0.0311745	-0.00100224	0.00627933	0.00750069	0.00476433	-0.0151713	0.00109711	-0.0023447	-0.00262417	0.0058427	-0.000445492	0.000167487	0.0047488	-0.0102178	-0.00871491	-0.00456792	-0.00660253	0.00702278	0.00752297	0.00569785	0.00812861	-0.00181824	-0.00605339	-0.00201357	-0.00423559	-0.00155732	0.000453195	0.00117113	-0.00254281	0.0042879	-0.00314976	0.00234412	-0.00141852
	H_malayanus	105	Ursidae	-0.0564551	0.0334346	0.0325334	-0.0325734	-0.0254593	0.0227562	-0.00726843	-0.0252556	0.0066736	-0.0106354	0.00565131	0.0105554	0.0117574	0.00146252	0.00242279	-0.00408761	-0.00170923	-0.00215594	-0.00225659	0.00656907	-0.00144212	0.000742335	0.000943011	-0.00105945	0.00499675	0.00559473	0.00326076	0.0019575	-0.00121766	-0.0102498	-0.00376422	0.00235811	-0.00195926	0.0044773	-0.0011074	-0.00153143	0.0031409	-0.00058638	0.00486665	0.00475728	0.000174407
	H_malayanus	109	Ursidae	-0.0547196	0.0808737	0.027058	0.000588166	0.0277855	0.00736687	0.000436564	0.00589637	0.00719975	-0.00306527	-0.00371263	0.00731243	0.000534729	0.005804	0.00748653	-0.00740858	-0.00907561	0.00242457	-0.00741959	-0.00124	-0.00501296	0.00869363	0.00116992	0.00975997	0.000273759	-0.00427924	-0.00397527	-0.00492309	0.000299436	-0.00226856	0.000508119	0.00188646	0.000985471	-0.00474655	-0.00514966	0.00123874	0.00299502	-0.000163667	0.000393583	-0.00271785	-0.00150261
	H_malayanus	112	Ursidae	-0.0557146	0.0160922	0.0640256	-0.0182311	-0.0197242	0.0335595	-0.0204607	0.007705	0.00950156	0.00873441	-0.00301342	4.50613e-05	0.00812699	0.015407	-0.00584794	-0.0110226	0.00395085	-0.00294435	0.011993	-0.00790838	0.00355238	0.0155378	-0.000916368	-0.00196743	-0.0063661	-0.0099243	0.00416864	-0.00595631	0.00219974	0.00337547	0.000914512	-0.000970174	-0.00100183	0.000371914	0.00118327	-0.00374441	-7.6018e-05	-0.00507855	-0.00265011	0.000744668	4.57445e-05
	H_malayanus	123	Ursidae	-0.0555426	0.0624216	0.0556236	-0.0210468	-0.0104177	-0.021002	0.0122106	-0.0223484	0.00796925	-0.0211828	0.00207651	-0.00426431	0.00416112	-0.00159009	0.00658298	-0.00144746	-0.00637601	-0.00310468	0.00323574	-0.0048831	-0.00612418	0.00496508	-0.00174618	0.00486997	0.000959253	0.000986817	0.0012611	0.00502876	0.00272278	-0.00161692	-0.00308753	0.00454484	-0.00476642	0.000835726	-0.00170259	0.00592836	-0.00135858	-0.00116747	0.0021996	0.000687708	0.00177983
	H_malayanus	124	Ursidae	-0.0476564	0.0231157	0.0522275	-0.0229888	-0.0126945	-0.00894071	0.00113719	-0.00692703	0.00946397	-0.00875724	0.00103391	-0.00476897	0.00477335	0.00891614	0.0124906	0.00414621	0.00730801	0.00759042	-0.00524412	-0.0103063	-0.00587551	-0.00181091	0.00424953	0.00772599	-0.000653593	0.00557713	-0.00393476	0.00322724	-0.00162071	0.00126977	0.00519204	-0.00427369	-0.00325458	0.000368539	-0.0035829	0.00107141	-0.00142883	0.00230054	-0.00155843	0.000508868	0.000966445
	H_malayanus	125	Ursidae	-0.022817	0.00831244	0.0543386	-0.0224475	0.00797254	0.0148469	0.00170729	0.0147229	-0.00166787	0.00224815	0.0194571	-0.00010072	0.0122821	0.000656961	0.00409672	0.000297392	-0.00369598	-0.0041964	0.00146633	-0.00465618	-0.00379856	0.00465414	0.00965538	0.000997756	0.00506116	-0.013002	0.00782313	-0.00454579	-0.0139363	-0.00241408	0.00699818	0.000258564	0.00655992	0.00304505	-0.00176703	-0.00102723	-0.0013572	0.00262784	-0.001172	0.00380056	-0.00119814
	H_malayanus	150	Ursidae	-0.0163138	0.0427732	0.0461962	-0.0097055	0.0101229	-0.000406347	0.0108079	-0.0115058	-0.00924567	0.00637086	0.00308871	0.00795976	0.0122346	0.0106612	0.000349401	-0.00802897	0.0106471	0.00650801	0.0161229	0.0150367	0.00405021	-0.00397098	0.000739755	-0.0059163	-0.00492626	-0.00415275	0.00715203	0.00538164	0.00341103	-0.00246715	0.00217056	0.000730475	0.00498834	-0.00396935	0.00103758	6.22193e-05	-0.000705768	0.000863908	-0.00655045	-0.00141367	0.000950332
	H_malayanus	156	Ursidae	-0.0214763	0.0281777	0.0583534	0.00272279	0.0241158	0.0167774	0.0252191	0.0147534	-0.0114035	0.0129663	0.0153501	0.00368637	-0.00361992	-0.0022226	-0.0030542	0.0167603	-0.0161908	-0.00193306	0.00780462	0.0167394	0.016402	0.0103533	0.00355313	0.00333938	-0.00209497	0.0078985	-0.0190802	0.00329511	-0.0135932	0.0149777	0.0100293	0.00374331	0.000500107	-0.00193402	0.0104852	0.00341714	0.00351741	4.38123e-06	-0.0018854	0.000277901	0.000811817
	H_malayanus	164	Ursidae	-0.0575726	0.0663877	0.0210702	-0.0128075	0.0079684	0.0262709	0.0178814	-0.000122476	0.00762418	0.00859777	-0.00610173	-0.00230842	-0.000874103	0.0051081	-0.00928955	0.00130947	0.00120931	0.0129904	0.00369468	-0.000239863	-0.00172157	0.00306736	0.0163649	-0.00828597	-0.0134496	0.00432515	-0.00557664	-0.000605182	0.00215127	-0.00397662	0.00263769	-0.00516858	0.00175866	0.000685857	-0.00138663	-0.00143351	0.00124214	0.00111749	-0.000700687	0.0023064	0.00076874
	H_malayanus	114	Ursidae	-0.0349904	0.0785124	0.026244	-0.0368577	0.0228101	0.00395637	0.00816794	-0.0090247	0.0183886	-0.00948757	0.00561427	0.00721236	0.0192436	0.00614725	-0.00193841	0.00116011	0.00101494	-0.00365975	-0.0115145	-0.00145819	0.00817031	-0.00150535	-0.0136292	-0.009682	0.00405409	-0.00123289	-1.77723e-05	-0.00041791	0.00633962	0.0146141	-0.00393851	0.00227517	-0.00514422	0.00567416	0.00012058	-0.00204865	0.00557412	0.00219082	-0.00065074	0.00124031	-0.00109385
	H_malayanus	115	Ursidae	-0.0539672	0.0726199	0.0161869	-0.000978044	0.0353512	0.0215203	0.00519551	-0.00635485	0.00737127	0.00842014	0.000141402	0.0182832	-0.0015773	-0.00731827	0.00153012	-0.00827892	-0.00227989	-0.00374254	-0.0013841	0.0128255	0.000539588	-0.00489326	-0.00688931	0.00134013	-0.00189802	-0.00778026	0.000441003	0.00123364	-0.000616004	0.000837976	0.00150469	0.00025136	-0.0049945	-0.00090462	-0.00625255	0.000347599	0.000527926	0.000474675	4.1603e-05	-1.91503e-05	-0.000492332
	H_malayanus	121	Ursidae	-0.0354266	0.0602733	0.0482343	-0.0206289	0.0215127	-0.00887047	-0.0186209	-0.0080422	0.00396637	0.00513813	-0.0116495	-0.00858758	-0.0101264	0.000569825	-0.000365646	0.00854349	0.00606498	-0.00815666	-0.000606019	-0.00757228	0.00415342	0.0101736	-0.00092601	0.00195595	-0.00527853	-0.00160374	-0.00399183	-0.00700936	0.00214805	-0.0040964	0.0070837	0.00330504	-0.0066662	-0.0021711	-0.0012845	-0.00124279	-0.0016379	0.00137927	-0.00165208	0.00126108	-3.64765e-05
	H_malayanus	122	Ursidae	-0.0518087	0.0346093	0.0462785	-0.0191861	0.00103695	0.013109	-0.0162896	-0.0146721	0.0159413	-0.00596647	-0.00553383	-0.00371141	0.00182105	-0.00743127	0.0125986	0.00136245	0.000493432	-0.00809449	-0.00229481	0.00849749	-0.00520072	-0.00048188	0.00354553	-0.00186755	0.0086404	0.00196564	-0.00595943	0.00334766	-0.000657969	0.000348418	-0.00726632	0.00161805	0.00401661	-0.00191238	-0.00194217	-0.00364737	0.00030695	-0.00220984	0.00108287	0.00229569	-0.0018094
	H_malayanus	138	Ursidae	-0.0500491	0.0523487	0.0626161	-0.019567	-0.00501491	0.0125814	0.00242672	0.0024275	0.000285435	-0.00354214	0.000401982	-0.00136615	0.000256739	0.00932828	0.00385555	0.00145149	-0.00862697	-0.00428927	-0.000606344	-0.00808182	-0.0127984	0.000280378	0.00527936	0.00144613	-0.00261173	0.00197253	-7.95166e-05	0.00445841	-0.000766417	0.000815583	0.00251405	-0.00193921	0.00216563	0.000929393	-0.00545955	0.00239164	-0.00104105	0.00107571	0.000521854	-0.000672569	0.0007724
	H_malayanus	157	Ursidae	-0.074474	0.0676833	0.0547417	0.00659614	-0.00525385	0.0169146	-0.00362731	0.00455503	0.0189812	0.0179102	-0.0126262	-0.0115275	-0.00166914	-0.0064858	-0.00785242	0.000452935	-0.00393682	-0.0044045	0.00372948	-0.0024348	0.00555736	-0.00940387	0.00410093	-0.00430216	0.00109386	0.00101601	0.00620164	0.00335004	0.00702868	-0.00390265	0.00301727	-0.000841152	0.00164149	0.00394911	-0.000502301	0.00355416	-0.000311775	-0.0043804	0.00136041	-0.00193741	0.00111304
	H_malayanus	158	Ursidae	-0.0471278	0.065122	0.0455311	0.0112409	0.00992616	-0.0166623	0.00899738	-0.0139512	0.00692034	0.00098554	-0.00563988	-0.00668905	-0.0124258	0.00187975	0.00534858	0.000638408	0.0112597	-0.00102291	0.00201439	-0.00716939	0.00187022	-0.00379464	0.00473055	-0.00265438	0.00396137	-0.00558244	-0.00734728	-0.00515369	0.00552564	0.00452444	-0.00485001	0.00342467	0.00623668	-0.001803	0.00613263	-0.000520077	0.00376038	-0.00379584	0.00404258	-0.000769637	0.00212869
	M_ursinus	126	Ursidae	0.0593454	0.0349659	-0.032688	0.00511841	0.0515075	-0.021471	-0.033194	0.0143636	-0.00471223	0.0199537	-0.00815095	-0.0122426	0.00192784	0.00406347	0.00165433	-0.00382763	-0.011234	-0.00364721	-0.00637727	0.00346817	-0.0100569	0.00517047	0.00827445	0.00414734	0.00638631	0.00584422	0.0148724	-0.00026878	-0.000360829	0.000693392	-0.00120366	0.00631377	0.00243821	0.00603358	0.00329775	-0.00434532	0.0020595	-0.00338415	0.00161919	0.000494409	0.00369065
	M_ursinus	140	Ursidae	0.0891975	-0.0468543	0.0513374	-0.0201998	0.0350059	-0.0137075	0.00608318	-0.0163772	-0.0123072	0.00773946	-0.000181848	-0.0130213	-0.00790372	-0.000372004	0.00748767	-0.0132831	0.00503557	-0.00772488	0.00531303	0.00174513	-0.00998653	0.000477985	-0.0110386	0.00622335	-0.00796837	0.00110441	-0.0004819	-0.00833901	-0.00139648	-0.00455209	0.00212459	0.00259691	-0.00392184	-0.00199258	-0.00455357	-0.00329509	0.00231591	0.00430778	-0.00107994	-0.00243335	0.00188744
	M_ursinus	141	Ursidae	0.0539855	0.0247823	-0.000855309	-0.0181834	0.00727762	-0.0281693	-0.0124546	-0.0015811	-0.0155633	0.00861183	0.00569164	-0.00386699	-0.00292536	-0.0115196	-0.000460938	-0.00605401	0.00272004	-0.0127233	0.00432215	-0.00863629	-0.00645373	-0.00793197	-0.000917401	0.00975277	-0.00531984	-0.00446294	0.0103687	0.0116959	-0.00181615	0.00404962	0.000417564	-0.0030856	-0.00466711	-0.00294006	0.00249874	0.00764498	-0.00116565	0.00217219	0.00169273	0.00117329	-0.00164057
	M_ursinus	163	Ursidae	0.0757123	0.038413	-0.0310664	-0.0363506	0.00763823	-0.0171234	-0.031216	-0.00842307	-0.00149291	-0.00811464	-0.00893489	-0.00353925	0.0229772	0.00728505	0.0115041	-0.00446394	0.0195613	0.00324028	-0.00192465	0.00279201	0.0093174	-0.000244158	-0.012228	-0.00104088	-0.0119871	0.00734967	0.00105718	0.00273058	-0.00707147	0.00356856	0.00543098	0.000881624	0.000761456	0.000334621	-0.000797192	0.000266653	0.000104413	-0.000671777	0.00244827	-0.00230023	-0.0001536
	M_ursinus	7	Ursidae	-0.0633179	0.0939834	-0.0233897	0.0152648	0.00825014	-0.0170725	0.00995693	-0.00809731	-0.006404	-0.0188449	0.0286804	0.0219919	-0.0082471	-0.00901132	-0.00211213	0.00101942	0.00270726	0.00730624	-0.0092333	-0.00826481	-0.00468199	-0.00109204	0.00377958	-0.0228534	-0.00237079	0.0068901	0.00445102	-0.00878077	-0.0112903	-0.0046856	-0.00505451	0.000840236	-0.00252343	-0.000745691	0.0017615	0.000947859	-0.00140193	0.000410572	0.00422081	-0.00467054	0.000995128
	M_ursinus	8	Ursidae	0.0639413	0.0708543	-0.00914321	-0.000162679	0.0157357	-0.0208727	0.00311787	0.00676383	-0.0132801	0.0243815	-0.00190928	-0.0187968	0.0162237	0.00981117	0.00273877	-0.0179179	0.00175829	0.0149694	-0.0076646	0.0126075	0.00450881	0.00426353	-0.00237302	-0.00447802	-0.00389323	0.00740391	-0.0087395	0.0017753	-0.000792675	-0.00108336	-0.00820847	-0.00780498	-0.00386381	-0.00460342	-0.00245819	0.00588686	0.00194999	-0.00454868	0.00223686	0.000226117	0.00201942
	M_ursinus	26	Ursidae	0.0877585	-0.0294137	0.0234561	-0.0137125	0.0485553	-0.00738995	0.0230989	-0.00768687	-0.0170822	0.0199831	-0.0016688	-0.0208593	-8.65245e-05	0.0214155	-0.000107095	0.0017844	-0.00909544	0.00187983	0.00155459	0.000850074	-0.0107587	-0.0156764	0.00299374	-0.00408575	0.00821596	-0.000657709	0.00341627	-0.000636717	0.00294791	0.00393354	0.00152499	0.00775481	-0.00289369	-0.00307587	-0.000372987	0.00590945	-0.00181343	0.00245099	-0.00182742	0.00172091	0.000783323
	M_ursinus	106	Ursidae	0.046349	-0.0457898	0.0219111	0.0103976	0.0280298	0.00613681	-0.000783155	-0.0115548	-0.0148471	-0.00494067	-0.0153081	-0.00805433	-0.00921851	0.00339189	-0.00217282	-0.0142735	-0.00343062	-0.00419663	0.0058852	-0.00555644	0.0056058	0.0047186	0.00505671	0.000141028	-0.00211071	0.0134623	0.00781532	-0.00250658	-0.00180672	0.00390955	-0.00437273	0.00107138	-0.00194441	-0.00346493	0.00237581	-0.00123207	-0.00221111	0.00128015	0.00574884	0.000656357	-0.00254901
	M_ursinus	135	Ursidae	-0.0323414	0.0814382	0.0186091	-0.0153381	0.0242483	0.00826685	-0.0043954	0.0239236	0.0148699	-0.000331358	0.00136006	0.00481447	0.00258416	-0.0263224	0.00287194	0.0116755	-0.00611863	0.000647642	-0.00549733	-0.00826664	0.00309665	-0.00174532	0.00572966	0.00165794	-0.00280389	0.00432469	-0.000567536	0.00386099	0.00188512	7.8568e-05	0.00246776	-0.00218891	8.16502e-05	0.00461763	-0.00392832	-0.002479	-0.000243991	-0.00354256	-0.00244228	-0.000911555	-0.00167745
	M_ursinus	139	Ursidae	0.0797997	0.0366601	-0.0120953	-0.00795292	0.0502766	-0.0199407	0.0126133	0.00249272	-0.0129088	0.00408509	-0.00348772	0.0262587	0.00467343	0.00609112	-0.0109249	0.00478183	-0.00125502	-0.00195499	-0.000960153	0.008415	-0.00554968	0.00638272	-0.00185495	0.00215251	-0.00458515	-0.00229021	-0.000292747	-0.000609674	-0.000711074	-0.00292457	-0.00070461	-0.00681073	0.00839722	0.00775523	-0.00295108	0.000895374	0.000497227	0.00284225	-0.000872428	-0.000668613	0.00570559
	M_ursinus	165	Ursidae	0.0952192	0.0286561	0.00550556	-0.0258701	0.00266992	-0.00915356	-0.0226242	0.0440307	-0.00495195	0.0116282	0.00490177	-0.00327818	-0.00626798	-0.00740982	0.00276168	-0.00530422	0.0101586	0.00745632	0.0166818	-0.00573055	-0.010802	-0.00667945	0.0125146	0.00432981	-0.00778689	-0.00447232	-0.00564488	-0.00491451	0.0051852	-0.00697166	-0.000488833	0.00504027	-0.00189917	-0.000753847	0.00772546	0.00454354	-0.000566153	0.000582199	-0.000383763	-0.00386068	-0.00072047
	T_floridanus	5	Tremarctinae	-0.0330034	-0.0167447	0.0204451	0.0119494	-0.03598	-0.000139602	0.0182517	-0.0124339	0.00629797	0.0110679	0.00450767	-0.0155707	0.0219925	-0.0269486	-0.00237736	-0.0125087	-0.00979721	0.0168345	-0.0081614	-0.0300028	0.00923279	0.0167555	0.00423615	-0.00317954	0.00175	0.012684	0.00500995	0.00640237	-0.000781183	0.0043118	0.0058027	0.00506095	0.00568323	-0.0104772	-0.00110996	-0.000961753	-0.000597809	-2.47434e-05	-0.00259962	-0.000247383	0.000691536
	T_floridanus	3	Tremarctinae	-0.000615742	-0.0350545	-0.0107137	-0.0159769	-0.0320583	-0.00765668	0.0124521	0.000410953	0.0137361	0.000267463	-0.00836181	0.0146435	-0.00359478	0.0200359	-0.00562507	-0.0235318	-0.00423787	0.0071267	0.0144426	-0.000994409	0.00584892	-0.0136397	0.00551533	-0.00457536	-0.0125304	0.00190787	-0.00754125	0.00152587	-0.00818876	-0.00927998	0.000694806	0.00739301	0.00533269	0.00667881	0.004987	0.004726	0.00420132	0.0038408	-0.00262138	0.000965306	-0.00406222
	T_floridanus	20	Tremarctinae	-0.00350481	-0.0281534	0.0161243	-0.0238799	-0.0433072	-0.0286749	0.00632644	-0.00135022	-0.00534315	0.00222067	-0.0293377	0.00193405	-0.0150096	0.0195385	-0.0193282	-0.0077727	-0.00526241	0.010925	-0.0181413	-0.00228624	0.0120612	-0.0133183	0.00366155	-0.00357265	-0.000485037	0.00458231	-0.00497803	-0.0058622	-0.00236344	0.00175551	0.00114264	-0.000163271	0.00462494	0.0041086	-0.000881717	-0.00158911	-0.00161022	0.00243177	0.0014097	-0.000204948	-0.00148583
	T_ornatus	13	Tremarctinae	-0.0280834	-0.0197625	0.00569848	0.0336056	0.00145154	-0.00927721	0.022734	-0.00569395	0.0142651	0.0092056	-0.0116338	0.00649946	-0.000783617	-0.00624056	-0.00395888	-0.000795844	0.00477971	0.0106545	-0.0120395	0.00359532	-0.00385151	-0.00489729	0.00426154	-0.00129375	-0.00206032	-0.0111462	-0.000351683	0.00308818	0.00498227	0.00474364	-0.000483294	-0.000985438	-0.00459189	-0.000642451	-0.00121539	-0.000216263	0.000839265	0.000416549	0.00331609	0.00166242	-0.000393292
	T_ornatus	15	Tremarctinae	-0.00285236	-0.0205076	0.0055885	0.0370743	-0.00784176	-0.00315379	0.00609567	-0.0107484	0.00788707	0.0257297	-0.00312286	0.0134119	-0.00382724	-0.00970432	-0.0147716	-0.0119693	-0.00109137	0.00392894	-0.00974709	-0.0111675	0.00311256	-0.00193077	-0.00420404	0.0163414	0.00704599	-0.01481	0.000631915	0.00757518	-0.00506954	0.00802169	-0.00508241	0.0003239	0.00194576	0.000999126	-0.00257503	0.00140967	-0.00262052	-0.000451042	-0.00229389	0.000209183	0.00172417
	T_ornatus	116	Tremarctinae	-0.0266671	-0.0523459	0.0322759	0.0302439	0.000403401	-0.0298555	-0.0077741	0.013493	0.00892212	0.0139405	0.00813342	0.0164589	-0.00742949	0.00802764	-0.00609714	-0.0125818	0.00246978	0.00216287	0.0086423	-0.00364634	-0.00463001	0.00607434	-0.000323488	-0.00477135	-0.00437222	0.00127067	-0.0019015	0.00144163	0.0021297	-0.00672084	-0.00453485	-0.00131356	-0.0063846	0.00248881	-0.000546568	-0.00350535	-0.00158134	0.00128648	-0.000797878	-0.00132268	0.00163133
	T_ornatus	120	Tremarctinae	-0.0198663	-0.0488946	0.0263894	0.0291034	0.014508	0.00862133	-0.0185763	-0.0114796	0.00864754	0.0105933	-0.00308869	0.00127122	-0.00266577	0.0110295	0.00828076	-0.000980094	-0.00213434	-0.0113757	-0.00249482	0.00536519	0.00272881	0.00593007	-0.0103348	-0.0050056	-0.00542526	-0.000896906	-0.00111303	0.00302525	0.000167413	-0.0037859	-0.00255831	0.0033625	-0.00012231	-0.00554021	0.00305328	0.000964874	-0.00690631	-0.00133886	-0.00218881	0.00294355	0.00244282
	T_ornatus	127	Tremarctinae	-0.0422111	-0.01949	-0.00810019	0.0385153	-0.00631376	-0.0178877	0.00776727	0.00354881	0.00370719	-0.00311349	-0.00951729	0.00548388	0.00528436	-0.0231045	-0.000685077	0.00805995	-0.0103016	-0.00171373	-0.00800864	0.00106632	0.00123774	0.00372897	0.00178737	0.00411517	-0.00590851	-0.0033314	-0.00864512	-0.0105334	0.000826576	0.00524163	-0.00479868	0.00138252	-0.00111729	0.000541408	-0.00199489	0.00074839	-0.00127628	0.00399653	0.000844856	9.62419e-05	0.000217056
	T_ornatus	151	Tremarctinae	-0.0754936	-0.030885	0.0163974	0.0334898	0.00104279	-0.00823717	-0.00726446	-0.00897333	0.0113249	0.00248703	-0.0124491	-0.000442133	-0.00941394	-0.00363705	0.00258236	0.0114893	0.00658598	0.00611094	0.0104017	0.00813936	-0.0033691	0.00290915	0.00670178	0.00452412	-0.00878859	-0.000153917	0.00984043	-0.00596542	0.00753922	0.00923761	0.00582781	-0.00171052	0.0046379	0.00201349	0.00114723	0.00293505	0.00392019	-0.00102163	0.00339406	-0.000740381	0.000798987
	T_ornatus	153	Tremarctinae	-0.0539233	-0.0184153	0.0139357	0.0211833	-0.0162057	-0.00748513	-0.0167	0.00753751	0.00290591	0.00673736	-0.00956279	-0.00260806	0.00498014	-0.0126997	0.000905049	-0.00326892	-0.00139215	-0.00652873	0.00511322	-0.00480332	-0.00854633	-0.00706288	-0.00615016	0.00804005	-0.00405805	-0.00210562	5.83576e-05	-0.00301201	0.00236245	0.00477621	-0.00136682	-0.000373261	0.000672617	-0.000662613	-0.000797794	0.00213845	0.00191604	-0.00191464	-0.00149335	0.00170701	0.00142942
	T_ornatus	166	Tremarctinae	-0.0259315	-0.00255576	-0.00698857	0.0238152	0.00427345	-0.0175833	0.0158794	-0.00797848	0.0159483	0.0148229	0.00294269	-0.00710628	0.0180619	-0.00845489	0.00193023	0.0211155	0.0144198	0.000955464	0.0187573	0.012792	0.000936073	0.00711541	0.000698165	0.000439762	0.000111531	-0.00389851	0.00701139	-0.00365792	0.000789614	-0.00184658	0.00279519	-0.00104076	0.00292039	0.00253518	0.00468988	-0.000276767	-0.00142182	0.00294702	0.00464205	0.00290789	-0.000479517
	T_ornatus	24	Tremarctinae	-0.00849217	-0.0517586	-0.00902641	0.0335978	0.00979002	-0.00588474	-0.00718301	0.0108096	0.023518	0.00384845	-0.0102788	0.0165483	0.000759638	0.00198572	0.00280168	0.00506863	-0.00406264	-0.0066909	0.00403788	-0.00975561	0.000695122	-0.0010839	0.00267429	-0.00392271	0.00224153	0.000105748	0.000880531	0.0062999	0.00913733	-0.00147277	0.000664895	-0.000586263	0.00384582	-0.000706231	0.00269233	0.00186799	0.000239957	0.00469532	-0.003113	-0.000413843	0.00164656
	T_ornatus	118	Tremarctinae	-0.00460002	-0.0599882	0.0218694	0.0340492	-0.0120463	8.91183e-05	-0.0143298	0.0233498	0.011201	0.00302627	-0.00254695	0.00540888	-0.0025429	-0.00442106	-0.00363254	-0.00521916	0.00103282	-0.0130631	-0.00317403	-0.00233531	0.00698633	-0.00137776	0.00723399	-0.000657767	0.00453748	-0.00655144	0.0040583	0.00103803	-0.0103684	-0.0015051	0.00716553	-0.00284721	-0.00523149	0.00731942	-0.00220652	0.00283005	-0.000638553	-0.000502867	0.00335925	0.00056354	0.000974209
	T_ornatus	128	Tremarctinae	-0.0409703	-0.0246564	-0.00607169	0.0394617	-0.00512966	-0.034982	0.00714753	0.00117418	0.00376681	-0.00595932	-0.00289937	0.00662909	0.00534817	-0.0221361	0.00452262	0.00869174	-0.00191157	-0.00417475	-0.00346641	0.00399645	0.00357277	0.00299101	-0.000899945	0.00208338	-0.00390753	0.00243634	-0.00540758	-0.00556554	-0.000308199	0.000916472	0.000886697	0.0025929	0.00159347	0.0019159	-0.00588756	0.00251082	-0.000323729	-0.00232195	0.000484849	0.000784538	0.00200935
	T_ornatus	152	Tremarctinae	-0.0462601	-0.0250823	0.0108815	0.0341342	-0.00363203	-0.0262772	-0.0161273	-0.00478073	0.0048923	0.00833112	-0.0269852	0.00378494	0.00310811	-0.00305787	0.00108128	-0.00972644	-0.00153537	0.0104609	-0.00359893	0.00362698	0.00455876	-0.00571123	0.000891854	-0.00380825	-0.0050354	-0.0017327	0.00272834	0.000462723	0.00377896	0.00456296	-0.00038043	-0.00103222	-0.00189986	0.00341335	0.00148405	-0.00173189	0.000325435	-0.00275948	7.14636e-05	-0.00290772	-0.00114054
	T_ornatus	154	Tremarctinae	-0.0147987	-0.0198794	-0.0182556	0.0369503	0.0125278	-0.025224	-0.0222669	0.00368151	0.0244035	-0.00906183	-0.0308514	0.0179869	0.00964094	-0.0043669	-0.00565796	-0.00460234	-0.00597316	-0.00317497	0.00255369	8.27849e-05	-0.00102641	-0.0047443	0.000336722	-0.0134156	0.00360919	0.00431588	0.0024313	-0.00819022	-0.00118265	-0.00704758	-0.00281509	0.00127516	0.00182269	-0.000754157	0.00126098	0.00179453	0.000824061	0.00171481	-0.00356977	-0.0004155	0.00137571
	U_americanus	29	Ursidae	-0.00355289	-0.0179683	0.0138899	0.0180168	-0.0164601	-0.0111032	-0.0247029	0.0166217	-0.0285465	0.0142696	0.00239371	0.00272741	-0.00443479	-0.00559488	-0.00792228	-0.00171038	0.0139065	0.00478937	-0.0142184	0.0102935	-0.011819	0.00633794	0.000481273	0.00319161	-0.00364824	0.00126621	-0.00438733	0.0113826	-0.00553877	0.00398627	-0.00485493	0.00416642	0.00199051	0.00132358	-0.00254307	0.00424696	0.00382579	-0.000213123	0.000218279	-0.000212307	0.00116934
	U_americanus	49	Ursidae	-0.0117582	-0.0157962	-0.0151624	0.0206817	0.0108306	-0.00608899	0.00355751	-0.0176718	0.00473078	-0.00361746	0.0179681	-0.00323553	0.00780853	0.00401868	0.00735031	-0.0038428	0.00859747	-0.00966574	-0.00869957	-0.00702673	-0.00107596	0.00613869	0.00541226	-0.00175374	0.00476825	0.0019267	-0.00331689	0.000744789	-0.00607041	-0.000408711	-0.00645604	0.00536699	0.00314878	-0.00119392	0.00227202	-0.000662573	-0.00442976	0.000957619	-0.00190304	0.00203529	-0.0034049
	U_americanus	58	Ursidae	-0.0381578	-0.0306009	-0.00612532	0.0270456	-0.0170821	0.0364726	-0.00887207	-0.0159288	-0.0346531	-0.014496	-0.0144813	-0.00555928	0.0205893	0.000635432	-0.0179138	0.00400936	-0.0068131	-0.00185007	0.00206254	0.00169145	-0.00680077	0.00389728	-0.00336923	-0.00791855	-0.00738373	-0.00196494	0.000705485	0.00121059	0.011128	0.00448275	-0.00333675	-0.00146924	0.00190683	0.00244393	0.00743311	0.00209227	0.00580057	0.000547493	0.000947778	0.00124601	0.00042443
	U_americanus	59	Ursidae	-0.0118091	-0.017736	0.0346002	0.0138524	-0.0204391	0.000541917	0.00795337	0.00110255	-0.0145172	-0.00115359	0.0134417	0.00821988	0.00857175	-5.11974e-05	0.00273196	0.00858704	0.00589088	-0.00588982	0.00194955	0.00621317	-0.00655154	-0.0146584	-0.00351792	0.000507728	-0.00421715	0.00300542	-0.00703088	-0.00239745	0.00458443	0.0054935	-0.000605591	0.00990393	0.00339322	0.00181382	-0.00653396	-0.00527382	-0.00672716	0.0032062	0.00173224	-0.00383631	-0.00114265
	U_americanus	69	Ursidae	0.021988	0.00274395	-0.00551794	-0.00139861	-0.00109897	0.0181651	-0.00839148	-0.016191	-0.0177027	-0.00774984	0.00168734	-0.00185939	0.0157523	0.0204288	0.00129004	-0.00648053	-0.00291354	-0.0134774	-0.00771427	0.0074755	-0.000443445	0.00257168	0.0010221	0.00181084	-0.000270002	0.0038017	0.00499556	0.00175875	-0.000895626	0.00312502	-0.00119173	0.00161733	0.00148037	0.00240371	0.000814397	-0.00182998	0.00115014	0.000505039	0.0019246	0.00144214	-0.00229946
	U_americanus	75	Ursidae	0.00504719	0.0115723	-0.00421125	0.0334543	-0.00484797	0.0147286	-0.00494629	-0.0249748	-0.0156968	0.0150964	0.00982727	0.00839124	-0.0095504	0.0137446	0.00274044	0.00919368	-0.000871039	-0.0147419	-0.0104519	-0.0119804	-0.00117776	0.00537258	0.00182761	0.00538514	-0.00267067	-0.00233145	-0.00587546	-0.00251192	-0.00200352	-0.00912668	0.00194567	-0.00346159	-0.00164861	-0.000173521	0.00808421	0.00327651	-0.00336912	0.00207568	0.000836341	-0.000943352	0.000140104
	U_americanus	76	Ursidae	-0.00265893	0.0106322	0.00933447	0.0302449	0.0110462	0.0163806	0.0208409	0.0202766	0.00799937	0.019325	-0.0135951	-0.0174221	-0.00717169	0.0207059	-0.00404418	-0.0103854	0.00105238	0.0140867	-0.00253817	0.00173398	-0.00264644	-0.00164301	-2.68501e-05	0.00594835	0.00540659	0.00246013	-0.00139768	-0.00546094	-0.0015712	0.006047	-0.0023194	-0.00420191	-0.00529315	0.00492979	0.0038588	-0.00458939	-0.00197108	0.0033044	-0.000359352	-0.00224242	-0.000932949
	U_americanus	99	Ursidae	0.0987149	-0.0128467	0.00572894	-0.0217904	0.00797275	-0.00753997	0.00571381	-0.0159262	-0.0130706	9.4146e-05	-0.00852792	0.00172069	-0.00586076	0.00651675	0.00478007	0.0102352	0.00587318	0.000513995	-0.00110048	-0.00371624	0.00253073	0.00247172	0.0060599	-0.00348765	-0.00103744	-0.01011	0.000269322	-0.000205696	-0.00428057	-0.00032728	0.00059205	0.00261885	0.00241693	-0.002888	-0.00304601	0.000956893	0.00431645	-0.00188275	0.00253379	-0.000296325	-0.00220689
	U_americanus	110	Ursidae	0.0386776	0.00804675	-0.00591774	0.0203501	0.0229575	-0.00234972	0.00619935	0.0115181	-0.00344499	0.000306668	-0.00139311	0.00168884	-0.00898808	0.0041031	-0.0103053	-0.0092256	0.00795559	0.00520567	0.0107307	-0.00300871	-0.0135572	-0.000375098	-0.00374631	0.00246319	0.0109363	0.00724026	-0.00125031	0.00289097	-0.00681195	0.00483302	-0.00233019	0.00296083	0.00362407	0.00418113	0.000499787	-0.000506173	-0.0021789	-0.00393489	0.00216028	-0.00160811	-0.00499716
	U_americanus	111	Ursidae	-0.00120969	0.0154264	-0.0135618	-0.0268205	-0.0382946	0.00461075	-0.0170281	-0.0071849	-0.0211296	-0.000863345	-0.027167	-0.0030462	-0.0198212	0.00137265	0.00673464	-0.00603104	-0.0110637	-0.0125293	0.00894839	-0.00337804	0.00601243	-0.00903856	-0.0100979	0.000615854	-0.00114214	-0.00132489	-0.00168218	-0.00201599	0.00238831	-0.00378584	0.00874572	0.00890087	0.00162946	0.00273256	-0.00141204	-0.00465142	-0.00239457	-0.00157036	-0.00395349	-5.03649e-05	0.000758011
	U_americanus	117	Ursidae	-0.00171176	-0.0536176	-0.0180975	0.00846752	-0.0223124	0.00563019	-0.000991203	-0.0104889	-0.00626726	0.0146007	0.00567876	0.0167537	0.00408399	-0.00535653	-0.00790879	-0.00101813	0.0118644	0.00808809	-0.00580867	0.00655424	0.00160978	-0.000888094	-0.000902076	-0.00479296	-0.00142616	0.000345163	0.0056309	-0.00232324	0.00203485	-0.00507712	0.00819934	-0.00136301	-0.000248697	0.000471227	0.00211043	0.000554653	-0.000582789	6.2506e-05	-0.00172992	0.00136871	-0.00184692
	U_americanus	119	Ursidae	0.014143	-0.0286053	-0.000919736	0.0177993	-0.0147957	0.0298727	-0.00421563	-0.00441111	-0.0143597	0.00833868	0.00422298	0.0214179	-0.00787287	-0.00819605	0.00201313	0.0189408	0.00104087	0.00472779	-0.00306289	-0.00699279	-0.00508717	-0.000908487	-0.00563503	0.00517346	0.00353066	0.00314272	-0.00227274	0.00123163	-0.00576015	-0.00459264	0.00196068	-0.00407499	-0.00224113	-0.00292475	-0.00268611	0.00207643	0.00395764	0.00374056	-0.00132961	-0.000501276	-0.000986177
	U_americanus	2	Ursidae	-0.0239193	0.021725	-0.0232646	0.00851267	0.0211269	0.0061083	-0.00914692	0.00433961	0.000595679	-0.00356208	0.0122948	-0.00597788	-0.00979122	0.00851171	0.00860541	-0.0109084	-0.00649199	-0.00773677	-0.0133791	-0.00131763	-0.000255775	-0.00131878	-0.00412641	0.00339302	-0.00729513	-0.00279997	0.00917223	0.00058356	0.000549488	0.000463848	0.00997712	0.000373789	-0.00313128	-0.00305817	-0.00287906	-0.000613334	0.00918634	0.00132802	0.00414637	0.00457567	-0.00115474
	U_americanus	22	Ursidae	0.0587456	0.00432184	0.00608421	0.0183944	0.0141634	-0.00487204	-0.00505949	-0.0265273	-0.0277929	-0.00514548	-0.0235996	-0.00951715	-0.01712	0.00907171	-0.000842091	0.0126029	0.0102917	0.00688709	0.000395994	-0.014441	-0.00073419	0.00776253	0.000685739	-0.00144634	-0.000597453	-0.0061668	0.00833739	0.000330802	0.0023352	-0.00197662	-0.00135447	0.0030809	0.000897947	0.00141745	0.00184243	0.00783171	-0.00235646	-0.000708337	0.00195934	-0.000472591	0.000885542
	U_americanus	23	Ursidae	0.0468318	0.0158919	0.0393157	-0.000361778	-0.0253106	-0.027985	0.00959247	-0.0017161	-0.0184891	0.00896805	0.00294756	-0.0139216	-0.0174378	0.00198534	-0.0184384	0.0125078	0.00643834	0.00768569	-0.00782673	-0.00449648	0.00672448	0.0128766	0.00558048	-0.00023395	0.00582789	-0.00455886	0.00472114	-0.00734695	0.00023758	-0.00294299	9.26429e-05	0.00306908	0.00340855	-0.00294199	-0.00274134	-0.000347033	0.00441024	-0.0011878	0.0013142	0.00109836	0.00305674
	U_americanus	25	Ursidae	0.0131927	0.0215334	0.00703444	-0.0120575	-0.020407	0.0181143	-0.0138606	-0.0234261	-0.0113672	0.0182765	-0.0271447	0.00702942	0.00598771	0.0204965	-0.0109598	-0.00282196	0.00178764	-0.000802985	-0.00203882	-0.00201495	0.00278628	-0.00144357	-0.00255123	-0.000671764	0.00359599	-0.00588702	0.00739739	0.00320381	-0.00340847	-0.00023729	0.00106092	-0.00761833	-0.000420291	-0.00232654	-0.00331426	-0.00553642	-0.000702206	0.00160537	0.00214776	0.00210612	0.00235666
	U_americanus	27	Ursidae	0.0484339	0.0094453	-0.00226734	-0.00161047	-0.00199662	-0.00569451	0.00896783	0.00294294	-0.0167654	-0.000871094	-0.00645032	0.012024	0.00327458	0.0023511	-0.00686911	0.0129225	-0.00234957	0.0142028	0.00529973	-0.00740849	0.00262608	0.00264134	-0.00197577	0.0110589	0.00441765	-0.00286391	-0.00432179	0.00945147	0.00148586	-0.00655002	-0.000143978	-0.00369223	-0.00354047	0.00647964	0.000197236	-0.0026406	-0.00243566	0.000846775	0.00125137	-9.22636e-05	-0.000881415
	U_americanus	28	Ursidae	-0.00155429	-0.0205535	0.00132927	0.0169848	-0.0107015	-0.000864369	-0.0201241	0.0135242	-0.0235646	0.0122092	0.00173165	0.00265861	-0.0057354	-0.00193144	-0.0168519	-0.00122299	0.00556613	-0.00141208	0.00705253	0.00718892	-0.0141155	0.00462379	0.000178547	-0.00177489	-0.00489007	-7.43478e-05	-0.000676829	0.0142619	-0.00351035	0.00147078	-0.00359889	-0.00105536	-0.000462592	-0.00698536	-0.00826725	-0.000374862	0.00195748	-0.0039408	-0.00302291	0.000210915	-0.00390811
	U_americanus	42	Ursidae	-0.0255397	0.0216355	-0.0032961	0.0242669	-0.0167011	0.0146746	0.0166835	0.00337855	-0.00690626	0.00367096	0.0029202	-0.00230206	-0.0029039	-0.00674474	-0.00946095	0.00825309	0.0150824	-0.00369279	-0.000837525	-0.00962491	0.00140985	0.0029493	-0.00810026	0.0060969	0.00857054	0.000273408	0.00441433	-0.00365752	0.000713072	-0.00333908	-0.00971558	-0.000834183	0.000391395	0.000238377	0.00655976	0.000413076	0.00460201	-0.0017099	-0.00410584	0.000758381	6.99121e-05
	U_americanus	47	Ursidae	-0.0434529	0.0162198	-0.00429187	0.0233948	-0.00897029	0.0201626	0.0101212	-0.00310277	-0.00547311	0.00949853	0.00988029	-0.00781571	-0.0118306	-0.00821484	-0.00243271	0.00434898	-0.0111636	-0.0158591	-0.00691445	0.00146215	0.00537201	-0.00208126	0.00310426	-0.00243774	-0.00310409	0.00494974	0.00299505	0.00750715	-0.00374692	-0.00110186	-0.00324134	-0.00769788	0.00193919	0.00478182	0.00482595	-0.00311626	-0.000310251	0.00163012	-0.00149462	0.000215362	-0.000904406
	U_americanus	52	Ursidae	0.0195976	-0.0341615	0.0298517	0.0129614	0.0131603	-0.0101769	-0.00785003	0.0110891	-0.0010946	-0.00566432	-0.00382284	0.00774602	-0.00953846	0.00372855	0.011052	0.0121942	0.00354866	0.00283137	-0.000728364	-0.00454758	0.00472634	0.00644649	-0.00509764	-0.00351675	0.0020227	-0.0112019	-0.0060668	0.00615122	0.00795392	-0.00135934	-0.00302602	-0.00532321	-0.00319533	-0.00123689	0.00956873	-0.000713936	-0.000657717	0.000977482	-0.00379542	0.000131236	0.000130843
	U_americanus	60	Ursidae	0.00908185	-0.0480678	0.0360034	0.000625431	-0.00784981	-0.0202171	-0.01603	-0.00888525	-0.0108472	0.00342238	-0.00721792	0.00232711	0.00407301	0.000719173	0.0139117	0.00634005	0.00399119	-0.00730044	-0.00691451	0.000291178	-0.00227797	-0.00939774	-0.00350817	0.00588435	0.00648189	0.00671327	-0.00680825	-0.00280222	0.00394961	-0.00466415	0.00101058	-2.26336e-05	0.000193516	0.000321413	-0.00403473	0.000266715	2.24574e-06	0.000561788	0.000755199	-0.00199044	-0.00361846
	U_americanus	64	Ursidae	0.046913	-0.0177838	0.0181431	0.00458421	-0.0104875	0.00772703	-0.000860843	0.00325321	-0.00623648	0.00639444	0.00503451	-0.00892423	0.0106285	0.0070711	0.0136694	0.00420296	-0.00506996	-0.0036847	-0.00326313	0.00538107	-0.00814676	-0.00526409	-0.00343849	0.00229272	0.0107596	0.00212841	-0.00538278	-0.0114165	0.00452109	-0.000236858	-0.00831334	-0.00440357	0.00706926	0.00286144	0.00233474	0.00302019	-0.000464877	0.000777841	-0.000251622	0.00119498	-0.000852229
	U_americanus	68	Ursidae	-0.000923214	-0.0198523	0.00601676	0.00254282	-0.0113934	-0.00469125	-0.00399323	-0.0139423	-0.00213533	0.00917732	0.0137456	0.0131395	-0.00224026	-0.00625226	0.00518568	0.0207509	0.0084841	0.000836809	-0.000270077	0.00717587	-0.0031815	-0.00953434	-0.000214074	-0.00565039	0.00624197	-0.00206994	0.010148	-4.50912e-05	0.00441742	0.00267812	0.00420902	-1.79714e-05	0.00136633	-0.00205115	-0.000853978	-0.00623056	0.0022772	-0.00320691	-0.00179391	0.000691633	-0.00301998
	U_americanus	107	Ursidae	-0.0409002	0.00212153	0.00226564	0.0113225	-0.0222321	0.0296139	0.0194814	0.00347253	-0.00201146	0.00424025	0.000341768	-0.00257646	-0.00363398	0.000431367	-0.0131926	0.00277683	0.0219577	0.00425297	-0.00777864	0.00342917	-0.00367377	-0.00549354	0.000677765	0.00398225	-0.00104724	0.00968119	-0.000796523	-0.00333227	0.00185965	-0.00190698	0.000757046	0.00524916	-0.00505997	0.00312586	-0.000242068	0.00613247	0.00155716	-0.00126853	-0.00239267	0.00179429	-0.00238727
	U_americanus	108	Ursidae	0.026083	-0.00322864	-0.0168468	-0.00456363	-0.0178422	0.0111658	0.00560258	-0.0111173	-0.0298686	0.0160315	0.00379565	0.000888825	-0.014113	0.000764259	0.0145836	0.00391658	-0.00910829	0.0117391	-0.00760745	0.00554591	-0.00267556	-0.0061542	-0.00907035	-0.0113769	-0.00114165	-0.00898333	-0.00862991	0.00305979	0.002142	0.00324199	-0.00230867	-0.00381866	-0.00279961	-0.000772148	-0.00185555	-0.0044321	-0.00110346	-0.00263027	0.00380739	0.00421682	0.000212895
	U_americanus	136	Ursidae	0.050953	0.00522353	-0.00552731	0.0118787	0.0173073	0.00600625	0.0409812	-0.0136588	-0.0129571	0.0054956	0.00154221	-0.00636121	0.00414403	0.00330196	0.00495735	-0.00702746	0.00405759	0.00467961	0.00814995	0.00148977	6.23754e-05	0.0096304	0.0030159	-0.00532927	0.00484623	-0.00271895	-0.00455475	-0.00108864	0.00234078	0.00202329	0.00259821	0.000287742	-0.000289272	-0.00207554	-0.000371069	0.00389471	-0.000451409	-0.0011196	-0.00379633	0.00121504	-0.000735569
	U_americanus	137	Ursidae	0.0212306	0.0173776	-0.0121711	0.0250299	0.0192593	-0.000840266	0.0198655	-0.00864976	0.00946264	0.0097984	-0.0124341	0.0101657	-0.0119191	0.00545386	-0.00214232	-0.00205271	-0.00135757	-0.00120936	0.00676822	0.0108552	8.00961e-05	-0.00299514	0.0082934	-0.00114891	0.0186697	-0.00111459	-0.00140577	0.00435515	0.00152671	-0.000224964	0.00998814	-5.46864e-05	0.00140454	-0.00600714	-0.00233285	0.00124477	-0.00305307	0.00112322	0.00529267	0.000249155	-0.00179735
	U_arctos	1	Ursidae	-0.0354039	0.0166534	-0.0629217	0.0255754	0.0217162	0.0198571	0.0291277	-0.00523584	-0.00152633	0.00251132	-0.00512204	-0.0235106	0.00638068	-0.00734619	0.0124408	-0.0170415	-0.00969191	0.0133976	0.0081925	-0.00471604	-0.00494703	-0.00323395	-0.00108915	0.00258777	0.00121982	0.00952712	0.00936581	-6.09026e-05	-0.0102014	-0.00538424	0.000598334	-0.00237111	-0.000469724	3.29155e-06	0.00256679	-0.00196232	0.00171605	0.00306764	-0.00286556	-0.000274298	-0.000769873
	U_arctos	4	Ursidae	-0.0133748	0.0481754	-0.0332133	0.0148455	0.0199329	-0.0208125	0.0366437	-0.00661598	0.00125117	0.00922146	0.00528285	-0.024281	-0.000965876	-0.00579769	-0.0053261	0.0130765	-0.0195556	-0.00372828	0.00893434	-0.00698661	0.000625447	0.00155603	-0.0043327	0.00334111	-0.00735939	-0.00405751	0.00489704	-0.00448724	0.00293476	-0.00287313	-0.00132809	0.00162712	-0.00103076	0.0112749	-0.00405124	-0.00675858	-0.000904336	0.000253057	-0.00338616	0.00112872	-0.00108797
	U_arctos	9	Ursidae	-0.0169851	0.0632319	-0.0445859	-0.0166981	0.00833028	-0.0126068	-0.00811038	-0.00729423	-0.0369477	-0.0121604	-0.0222457	-0.00593803	0.0105838	-0.00436081	-0.00423257	0.00197112	-0.0113146	0.00189591	0.00566471	0.00216893	0.00259276	0.00352683	0.00333586	0.00828109	0.000694136	-0.00647152	-0.00608566	-0.00224809	0.0032129	0.000441354	-0.00242663	0.000219781	-0.00278056	0.00389386	-0.000638335	0.00310223	0.00165421	0.00160326	-0.00322433	0.00146348	-0.00064384
	U_arctos	10	Ursidae	-0.0289721	0.0837255	-0.0497781	0.00519441	0.0115607	0.0190775	-0.00542996	0.0379727	-0.025309	-0.00558682	0.00969684	-0.0107029	-0.00728143	0.00149399	-0.00222752	-0.00857051	-0.00499417	-0.00376026	-0.00560844	0.000628715	0.0201005	0.00694908	-0.00439511	0.000429294	0.0119655	0.00167606	-0.0078622	0.00118435	0.00378036	-0.00909162	0.00140886	0.00249772	-0.00210678	-0.00635411	-0.000477952	0.00132872	-0.000648632	0.000725247	0.000778906	-0.00169716	-0.000322224
	U_arctos	38	Ursidae	0.0452155	-0.0645642	0.00199838	0.00551204	-0.0136617	0.0133771	0.0123048	-0.00221761	0.0176921	0.00732276	0.0144101	-0.0133791	0.0143442	0.00400517	0.0128908	-0.00268003	-0.00098263	0.00973002	-0.0165504	0.00538483	0.0097142	-0.00138255	0.00644225	0.00310989	-0.00325051	0.0022709	0.00235472	-0.00189438	0.000969254	0.00394128	-0.00112546	-0.00049468	0.00188556	0.00305693	0.00195481	-0.00192214	-0.00182835	-0.000168785	0.00131519	0.000943427	-0.00124667
	U_arctos	43	Ursidae	0.0522201	-0.0132613	-0.00254884	-0.00785859	-0.0168576	-0.0046887	-0.00481605	0.0260811	0.0143905	-0.00747716	0.00485416	-0.00642607	-0.00835368	-0.000641103	0.0170783	0.00983411	-0.0019623	0.000155859	0.00470779	-0.00271554	-0.00507235	-0.00236033	0.0195317	0.00276148	0.00178707	-0.0057462	0.00620492	-0.00264298	-0.000174416	0.00201701	0.00229696	-0.00136322	0.000195236	-0.00502365	0.00186338	-0.00454909	0.00348491	0.00180185	0.000114922	-0.000759128	-0.00142958
	U_arctos	44	Ursidae	0.0463387	-0.022554	-0.00902714	-0.00411865	-0.0164963	-0.0215918	0.0112017	-0.0104803	-0.00119601	0.00239431	0.0271899	0.0299723	0.000627495	0.0037712	0.0112273	-0.00835598	-0.00368207	0.00869632	-0.000410319	-0.00586313	0.0126553	0.00855746	0.00764158	0.00926433	-0.00657155	0.00397762	-0.0126799	0.0028005	0.0108099	-0.000431718	-0.00268606	-0.0016824	-0.00554524	0.00170402	0.00160919	-0.00260026	0.00189506	0.00129561	0.000141608	-0.000216992	0.00163491
	U_arctos	45	Ursidae	0.0777238	-0.0103551	-0.0199869	-0.0089229	0.00979787	-0.0172003	-0.00434883	-0.011229	0.00974451	-0.00887348	-0.0120119	-0.00761177	-0.000597187	0.00720094	0.009175	0.0107505	0.00414448	0.0049016	-0.00537365	-0.00470027	-0.00428477	-0.00451296	-0.0101854	-0.013157	0.00276081	-0.00689548	-0.00329287	0.00978076	-0.00696855	0.00402011	-0.00037317	-0.00904168	-0.00454403	0.00503858	0.00109964	-0.000931211	0.000186476	0.0016122	-0.00107572	-0.0015067	-0.00342191
	U_arctos	50	Ursidae	0.0186553	0.0385129	-0.015635	-0.0325511	-0.0312813	-0.0282909	-0.0230223	0.0168954	-0.0260685	4.59586e-05	0.016393	0.00263317	0.00296429	-0.00604637	-0.00364077	-0.0109502	-0.0102957	-0.00130634	0.011092	0.000587209	0.0105958	-0.0114289	0.00600297	-0.00485163	0.00534626	-0.00164806	0.00117978	0.00856942	0.0019903	-0.00280729	0.00144732	0.000741406	0.000455777	0.00120191	0.00288209	-0.00483721	0.00289625	0.00108715	-0.000899823	5.76061e-05	0.000332511
	U_arctos	51	Ursidae	0.0320339	-0.00129784	-0.0120058	0.0118771	-0.00884647	-0.00731459	-0.00395968	-0.0153366	-0.00969363	-0.00458394	0.00781032	-0.00472176	-0.00679221	-0.0066756	0.0109214	-0.000730293	0.000937386	0.0090557	-0.00191831	-0.000216059	-0.0015757	0.00586963	-0.00699965	-0.00517897	-0.00304375	-0.00066698	0.00538827	-0.00487642	0.000582799	0.000179892	-0.000391961	0.00380626	0.00129232	0.00196718	0.000475648	-0.00507531	-0.00121056	0.00282995	0.000625034	-0.000429974	-0.000640846
	U_arctos	54	Ursidae	0.0231286	-0.00386627	-0.0204493	0.0257559	-0.00480496	0.0203149	0.00853432	-0.000560854	-0.0113807	-0.0221524	0.0073144	0.00361106	0.00435816	0.00124022	-0.00605714	-0.00372815	-0.00363106	0.000718953	-0.0103025	0.0105745	-0.00195876	-0.00318688	0.0199941	0.00857624	-0.00830571	-0.00258129	-0.00255022	-0.00405632	0.00496741	-0.00251645	-0.000918797	0.00390189	-0.00776132	0.00290379	-0.00244677	-0.0020189	-0.00782045	-0.00495243	-0.00221856	-2.38805e-06	-0.00215291
	U_arctos	55	Ursidae	0.0355418	0.00515184	-0.0229324	0.0255937	0.00884561	0.00360333	-0.0116912	-0.000588006	-0.00910887	-0.0115957	0.00236168	-0.0103443	-0.00194288	-0.000840663	0.0102729	0.00222414	0.00635473	0.00848355	-0.00504856	0.00170275	-0.00103279	0.00421521	-0.0017014	-0.00706419	0.00195246	-0.00461449	-0.00374878	-0.00438826	0.0063965	0.00371628	0.00175356	0.00285579	0.00910691	-0.0016425	-2.70546e-05	0.000576377	0.00189549	0.00296409	-0.00239475	-0.00117181	-0.000302564
	U_arctos	57	Ursidae	0.0399593	-0.027208	0.00788508	0.0166994	-0.013888	-0.0170697	0.015042	0.0196259	-0.0110902	-0.00636031	0.0155341	0.0115013	0.00627314	0.00506239	0.00139062	0.00140925	-0.00886054	0.00113579	0.00618968	0.00610954	-0.00682276	0.0042789	-0.00628551	0.00101922	0.00243966	-0.00784192	-0.0013331	0.00372112	0.00147082	-0.00922315	-0.000337844	-0.00248946	0.00308683	-0.00483937	-0.0047859	-0.00322854	0.00265098	-0.00343142	0.000895808	0.000567882	0.00136122
	U_arctos	70	Ursidae	0.0561091	0.00854597	-0.0328925	0.0306173	0.0188836	-0.00200328	0.00956494	0.00879485	0.0108842	0.00685318	0.0104894	0.00762616	7.90328e-05	-0.00162464	-0.000281518	-0.0210737	-0.00374157	-0.00278903	-0.00160172	-0.00285205	-0.00765154	-0.00711131	-0.009012	-0.00200681	-0.000329521	0.000361057	-0.00196764	0.00350273	0.00835289	0.00213313	0.0110573	0.00244099	0.000733752	-0.00194306	0.00134684	0.00188277	0.00536093	-0.00173654	0.000103889	-0.00133899	0.00175902
	U_arctos	73	Ursidae	0.0232952	-0.00257197	-0.0170784	0.00685546	-0.0148079	-0.0120721	-0.0192775	0.00794515	-0.0146839	-0.0268284	-0.0121361	-0.0039005	0.0115233	-0.00929156	0.00129958	-0.00373553	-0.00192305	-0.00309547	0.0115155	0.00712636	0.00553184	-0.000910093	-0.00182493	0.00458961	-0.00328679	5.33001e-06	-0.00414285	-0.0044238	-0.00224296	0.0064316	0.0020787	-9.74019e-05	-0.000451961	0.00295975	0.00103747	-0.000632193	-0.00288827	-0.00398206	-0.000733595	8.07602e-05	-0.00146155
	U_arctos	32	Ursidae	0.0243141	0.046305	-0.0619711	0.00488624	0.000496792	0.00534626	-0.0152756	0.0106065	-0.00496477	-0.00668456	-0.00942642	0.0189619	0.00693255	0.00362651	-0.00948887	-0.00370109	0.00271321	-0.00116012	-0.00189236	-0.00655565	5.64319e-05	0.020336	-0.000333258	0.00103607	0.00364485	-0.00546315	-0.00282685	-0.00576577	0.00434588	-0.00520546	-0.000207566	-0.00342069	-0.00042554	0.00030179	-0.00338143	-0.000827127	0.000263485	0.00350598	0.00494641	-0.000955281	-0.00157301
	U_arctos	36	Ursidae	-0.0204966	0.0510574	-0.0306824	0.0177004	-0.0102216	0.0344378	-0.00399052	0.032965	-0.00405559	0.00288617	0.00860164	-0.00380417	-0.0242916	0.00236566	-0.0133474	0.00873732	0.00761082	-0.00998407	-0.00676798	0.00236192	0.00197821	-0.00592494	-0.00473575	-0.0127921	-0.00187578	0.00894297	0.00674433	-0.000105139	0.00570075	-0.0004336	0.000711933	0.000115105	0.00327295	0.00131444	0.000747568	0.00187948	-0.00330513	-0.00348378	-0.000258158	-0.00164263	-0.00175695
	U_arctos	37	Ursidae	0.00353824	0.00166345	-0.0509804	0.0308891	-0.00255624	0.0132552	0.00663837	-0.0218618	-0.00201267	0.0160268	0.00279423	0.0031043	0.00620988	0.00859659	-0.00584113	0.00214895	0.00185818	-0.0225448	0.00833985	-0.00906395	0.0050237	0.00255231	0.000825599	0.00572205	0.00663506	0.00368915	0.0017628	-0.000559203	0.00339804	-0.00101347	-0.000769349	-0.00244836	-0.0041037	0.00456292	-0.000411811	0.00114937	0.00184116	0.00134359	9.13562e-05	-0.000148436	-0.00255288
	U_arctos	39	Ursidae	0.0576928	-0.0435751	-0.0332859	0.00713583	-0.000765067	0.00966176	0.00116484	0.0217063	0.0166135	-0.00604709	0.00575217	0.00716488	0.00895721	0.0122612	0.00919268	-0.000986344	-0.0025828	0.00291924	0.0122855	-0.00160516	-0.00373272	0.0120773	-0.00778633	0.00158317	0.00575776	0.00376542	-0.00487288	0.00368584	0.0016801	-0.00636697	-0.00302235	0.000196418	9.55947e-05	0.000740885	-0.000953396	-0.00166718	-0.00264163	-0.00210984	0.00427275	0.00150529	-0.00160194
	U_arctos	40	Ursidae	-9.74648e-05	0.0419819	-0.0244839	0.014551	-0.00412362	0.00862102	0.0181295	-0.000968051	0.00771258	-0.0232652	-0.00314566	-0.00548078	-0.0126929	0.0148482	-0.00332666	0.00149538	0.00918845	-0.00187904	-0.00816305	-0.00235522	-0.000220616	-0.00152819	0.00264387	-0.00255251	-0.00349295	0.00595986	-0.000916837	0.00142204	0.00318028	0.00141462	0.000494319	0.00668299	-0.000273602	-0.00199066	0.00181992	-0.000951382	-0.000232052	-0.000411555	0.000905089	0.000323102	0.000755778
	U_arctos	41	Ursidae	-0.00811932	-0.016194	-0.0183714	0.0259438	-0.0303864	0.0282772	0.0137665	0.00358219	-0.00544921	-0.0154805	-0.0133667	-0.0115666	0.00249294	0.00827357	0.0110745	-0.0093741	0.0111515	-0.00259024	0.0105468	0.00387426	0.000227338	0.0085567	0.00313301	-0.000342415	-0.00105001	-0.000595224	0.000839873	0.0186651	0.00270184	0.00412629	0.0014325	0.00854814	-0.00324863	0.00129141	-0.0032917	-0.00210547	-0.000847302	0.00143816	0.00485727	-0.000744098	0.00345477
	U_arctos	46	Ursidae	0.00530906	-0.000280016	-0.0378988	0.0193685	0.00131627	0.0147279	0.0166418	0.0115736	0.0057035	-0.00776207	-0.00345658	0.00268117	-0.00409263	0.0145703	-0.00389743	0.0157479	0.00344467	-0.0103966	0.00066528	-0.00852528	0.000261957	0.00537512	-0.0126076	0.00654135	-0.0117398	0.0109566	-0.0022975	-0.00121646	-0.000687511	0.00776381	0.00121232	-0.00496527	0.0030893	-0.00436231	-0.00587343	-0.00414074	-0.00114917	0.0045224	-0.00236908	-0.000833285	0.00124415
	U_arctos	56	Ursidae	0.0253629	-0.0126729	-0.0315889	0.0141142	-0.00128287	0.00263778	-0.000811816	0.011278	-0.00593203	-0.0224658	-0.00300463	-0.00344071	0.00917204	0.00276049	0.00603216	0.000175542	0.0018856	0.0168813	0.000628205	-0.00180679	-0.00534788	0.010546	0.00914891	-0.00451589	-0.00371103	-0.00246856	0.00577797	0.0065832	0.00114357	0.00544483	0.00689504	-0.00111825	-0.00611002	-0.00165799	0.000210293	0.000630396	-0.00142498	0.000578216	-0.00221335	-0.000356887	-0.00194654
	U_arctos	61	Ursidae	-0.000731036	0.0211021	-0.0349711	0.0128924	0.0155391	0.0088714	0.013424	0.0103267	-0.000138954	-0.0134597	-0.00490205	-0.00606952	0.0111038	0.00346966	-0.0015405	-0.00268495	0.014765	0.00751118	-0.00244672	0.00271373	-0.00791003	-0.00680012	0.00461965	0.00420217	0.00410583	-0.000554432	0.00170057	0.000635563	0.00199883	-0.0011262	-0.000483808	-0.00298049	0.00118236	-0.00098268	-0.00456286	-0.000111045	-0.00382261	-0.00166216	-0.00390425	0.00246954	-0.000395694
	U_arctos	65	Ursidae	0.0123713	-0.008767	-0.0129443	0.0595164	0.0434461	0.00529427	-0.0809071	-0.0469193	0.0279508	-0.0179597	0.0493966	-0.0257289	0.0128119	0.0240985	-0.0304129	0.0156907	-0.0111546	0.0198938	0.0132149	-0.0085953	0.0133225	-0.0194098	0.00304407	0.0153696	-0.000570121	-0.000514018	-0.00453969	-0.000441955	-0.000323656	-0.000949775	-3.90978e-07	-0.000264097	0.000587761	-0.00368886	-0.00443601	0.000567762	0.000411806	-0.000378634	0.000815712	-0.00172917	0.00049012
	U_arctos	66	Ursidae	0.0242905	-0.0288087	-0.00850228	-0.0114495	-0.000305835	0.00727436	-0.000499834	0.0247992	-0.017668	-0.00477044	0.00197472	0.000894854	0.00409207	0.00487797	0.0169635	-0.00363346	0.00315724	0.0202599	-0.00127868	-0.0076503	-0.00375346	0.000615889	-0.002138	0.0114892	0.00765079	-0.00443815	0.00124545	-0.00623706	-0.00941842	0.00234396	-0.00478512	0.00269424	-0.00386707	0.00423208	0.00247267	-0.000464496	0.00101736	0.000148794	-0.00286302	0.00287201	-0.000849079
	U_arctos	71	Ursidae	0.0580001	-0.0127611	-0.0187171	0.0232702	0.00311196	-0.00205147	-0.0118629	0.00572986	-0.00156768	-0.0088156	-0.00099818	0.0110626	0.00973259	8.51102e-05	0.015818	0.0126031	0.00158953	-0.00629647	-0.0038486	0.00785831	0.000177975	-0.00763083	0.00888126	-0.00172465	0.0058918	0.00899376	0.00840905	-0.0033981	-0.00315647	0.0037933	-0.00409317	-0.00256279	-0.00680608	-0.00632972	-0.00518576	0.00264754	0.0068244	-7.45414e-05	-0.00231989	-0.00139326	0.00193439
	U_arctos	74	Ursidae	0.0639499	-0.0560896	0.00205144	-0.0108411	0.00726249	0.00988213	-0.01359	0.0224553	-0.00150141	0.00502502	0.0155123	-0.00135841	0.00387609	0.0256744	0.00640274	0.00268167	0.00324854	0.00690252	-0.00508124	-0.000903005	-0.000192049	0.0070742	-0.00383225	-0.00140571	0.00205583	0.000447221	-0.00257861	-0.00234909	-0.00470604	0.000846865	0.00358309	-0.00217862	0.0105756	-0.000331001	-0.00355583	0.000189121	-0.000669448	-0.00271764	-0.000582714	0.00343913	0.00178593
	U_maritimus	30	Ursidae	0.0734341	0.0131827	0.0049845	-0.0167247	-0.0217254	-0.00237163	-0.0184395	0.00167887	0.00281204	0.0013723	0.00156816	-0.0104642	-0.00644694	-0.0151595	-0.0141143	0.000878908	0.0110794	-0.00183656	-0.000883371	-0.00514157	0.00190319	0.00310303	-0.000960952	0.00271662	0.00951563	0.000536299	0.00407493	-0.00557213	-0.000665244	-0.00115526	0.000192989	-0.00121568	-0.000954423	0.00413347	0.000614169	0.000668584	0.00334888	-0.00116581	-0.000547949	0.00100515	-0.00151807
	U_maritimus	31	Ursidae	0.0926397	-0.0590363	0.000420112	-0.00829822	0.00890707	0.0244109	0.0116822	-0.00456338	0.010232	-0.00174934	0.0060442	-0.00117819	0.00902281	-0.0143251	0.0112713	-0.00256708	0.00426416	-0.0115077	-0.00414176	-0.00458151	0.00338004	-0.00594003	0.00943783	-0.000310751	0.00153515	-0.0041413	-0.00611413	0.00136396	0.00477739	-0.00330137	0.00855692	-0.00145055	-0.0029761	0.00337958	0.00163865	-0.000398821	0.00326221	-0.00261014	0.00179087	0.000929177	7.985e-05
	U_maritimus	67	Ursidae	0.0594844	0.0372295	-0.000982485	-0.00437182	-0.00721686	0.00819718	0.0134821	0.0163926	0.0114319	-0.0189022	0.00300878	-0.0064706	0.0234821	-0.0040367	-0.00679605	-1.81791e-05	0.0128924	0.00133986	-0.0116313	0.00262753	0.00196931	-0.00490482	-0.00424822	0.0070672	-0.00878088	-0.0157708	0.0021093	0.00239797	-0.0101996	-0.00542664	0.00599848	-0.000303738	0.00317383	0.00261377	-0.000892312	0.00217593	-0.000114861	0.00415079	0.00156682	-0.00136637	-3.46645e-05
	U_maritimus	89	Ursidae	0.10032	-0.0457852	0.0091254	-0.0214731	-0.00598677	0.00664719	0.00833461	0.00600411	0.0192325	-0.00289348	0.0101722	0.013585	0.00967111	0.00180967	-0.0149304	0.011709	0.0111789	0.00247922	0.00502313	0.0107753	0.00517476	0.000345872	-0.00402182	-0.00226879	-0.000700861	0.00190647	0.00888393	0.00451093	-0.00193851	-0.00799132	0.000728348	0.00721474	0.00216744	0.00242715	-0.000382629	0.00108374	-0.00217233	0.00166714	-0.000239327	-5.48919e-05	0.00194247
	U_maritimus	113	Ursidae	-0.0438619	0.0651229	0.0482438	0.00316402	0.0142806	0.0135451	-0.00857238	0.00378156	-0.0019712	0.00322114	0.00243491	0.00622558	-3.88134e-05	0.0053518	0.00309309	-0.00474116	-0.00148242	0.00849774	0.00133381	0.00644697	0.00526644	0.000987402	-0.000841219	-0.00258837	-0.00254415	-0.00633779	0.00461404	-0.0106417	-0.00121516	-0.00248874	-0.00398283	-0.0064918	0.0031019	-0.00144963	0.00705676	-0.00308985	0.000330771	-0.000255018	0.00227828	-0.00285173	-0.00185305
	U_maritimus	129	Ursidae	0.0764627	0.0359697	-0.0284321	-0.0207265	-0.0169377	-0.00579789	-0.0147059	0.00467044	-0.00021809	0.0104372	0.00216908	-0.0173744	-0.0182934	-0.00868622	0.00518841	0.00173003	-0.000508952	0.00260711	-0.00395463	-0.000385144	-0.00991583	-0.00510436	0.00109093	0.00131237	0.00197635	0.00619823	-0.00155859	-0.00236659	-0.0071792	-0.00339051	-3.14171e-05	-0.000434125	-0.00131496	0.00406349	0.00165281	-0.00404866	0.003974	0.00152383	-0.00132209	6.25603e-07	0.00324679
	U_maritimus	130	Ursidae	0.0591474	-0.0010583	0.0130943	-0.0353547	-0.0426522	-0.00940173	-0.00579195	0.00069106	0.00361315	-0.00997675	-0.00371586	-0.011321	-0.0122478	-0.0139871	-0.00597971	0.00223069	0.00572859	0.0010191	0.0101928	-0.0031226	0.00236108	-0.00380931	-0.00680784	0.00366465	0.000673058	0.00561523	-0.0041133	0.00198723	-0.00310332	0.00234698	0.00135101	-0.00535982	0.00409399	-0.00307159	-0.000499321	0.00301758	-0.00227862	0.00226003	0.000115302	0.00158793	0.000335048
	U_maritimus	133	Ursidae	0.126473	-0.045284	0.0126662	-0.0181991	0.0160413	0.00179887	0.0121686	0.00405326	-0.0255321	0.00986499	-0.000666209	-0.00128269	-0.00884803	-0.00482554	-0.00695511	0.0151018	-0.00845261	-0.0071729	-0.00158533	0.00354519	0.012467	0.00113509	0.00989492	0.000823806	-0.00830613	0.00155232	0.00279162	-0.0051146	-0.00473782	0.0052968	0.00501132	0.00160474	-0.00280097	-0.00139286	-0.00336868	2.28624e-05	-0.00577944	-0.0032242	0.0048947	-0.00203056	0.00206705
	U_maritimus	160	Ursidae	0.0992135	-0.0390974	0.00409491	-0.0102238	0.00337633	0.00115161	-0.00455421	-0.00679492	-0.00171711	-0.00815457	0.00561796	-0.000203008	-0.00621413	0.00122638	0.00180628	0.00176588	-0.00478435	0.000960622	-0.000948444	0.00509714	0.00252894	0.0102088	-0.00363073	-0.00393273	-0.00635432	0.00413741	0.00257551	-0.00695024	-0.00346734	-0.00053779	-0.00309646	-0.00181348	0.00203011	-0.0046454	0.00719265	0.000502969	-0.00613067	-0.00261013	-0.00155326	0.000809821	0.00202907
	U_maritimus	161	Ursidae	0.0968671	-0.0380132	-0.00353076	-0.0102932	-0.0247748	0.0305724	0.00448643	0.000254076	0.0128074	0.00151053	0.00597186	-0.00547473	0.00404462	-0.0108676	0.00415505	0.00191229	-0.00418956	-0.00337879	0.00496521	0.00163597	-0.00595473	-0.0018756	0.00449445	-0.000626809	0.00363372	0.000490699	-0.00813262	-0.000994688	0.00716913	-0.000219162	-0.00254643	-0.00216989	-0.00604279	-0.00167047	0.00457266	-0.00176646	0.00351881	0.0039348	0.00211144	0.00105487	0.00379792
	U_maritimus	48	Ursidae	0.115127	-0.044441	0.0142616	-0.0183039	0.0202498	0.0245695	0.000919409	0.00567247	0.00200555	-0.00478058	-0.00142875	-0.00282565	-0.0197588	-0.010937	-0.00703826	0.00777596	0.0052208	-4.48413e-05	0.00248241	0.000511995	9.23037e-05	0.00337499	0.00121563	-0.000178786	-0.0105769	0.00207957	-0.000444524	-0.00287935	0.00522244	-0.00150638	-0.00332399	-0.000241944	-0.000524662	0.0041143	-0.00401911	-0.0020709	0.00232299	0.00213915	-8.66579e-05	-0.00284012	-0.00129916
	U_maritimus	62	Ursidae	0.0732201	0.0387489	-0.0280481	-0.0335745	-0.0300054	-0.0120555	-0.0131647	-0.000905328	0.000688643	0.0109019	-0.00214847	-0.00649257	0.000944296	-0.00851488	-0.00892259	0.00782798	-0.00902819	0.0133116	-0.000317027	0.00796931	-0.00437149	0.00832856	0.00387298	-0.00216252	0.00570532	0.0064833	0.000802942	0.00122323	0.00738387	0.00242071	0.00195124	-0.00528695	-0.00221441	-0.00222092	-0.00490007	-0.00394078	-0.00266477	0.00483113	-0.00272305	-0.00246066	-0.0002906
	U_maritimus	63	Ursidae	0.0948593	0.0293017	-0.0295407	-0.0331019	-0.00358273	-0.0200329	0.0184454	-0.00574344	0.0182888	-0.0161472	-0.00223653	-0.00910154	0.00997116	-0.00360578	-0.00151999	0.0107093	-0.000450847	0.00140227	-0.0119384	-0.000283558	-0.00534903	-0.00550394	0.00209413	-0.00377386	-0.00133825	0.00422482	-0.000334512	0.00905205	0.00760563	0.000220769	0.002746	0.00100406	0.00825559	0.00243027	0.000288909	0.00377328	-0.00137222	-0.001406	0.00211525	-0.000625279	-0.000370172
	U_maritimus	90	Ursidae	0.113758	0.0137397	-0.0356444	-0.0172021	0.027039	0.0162949	-0.00697278	-0.000791961	0.0146658	0.00128492	-0.00278025	0.0118581	0.00492523	-0.00720488	-0.00381096	0.00326281	0.00508466	-0.0136136	-0.00491605	0.00896529	-0.00913797	0.00239682	0.00383336	-0.00152041	-0.00391359	-0.001569	-0.00474009	-0.000548112	0.00282026	-0.00413371	0.000885393	0.00129777	9.29994e-05	-0.00574486	0.00427724	-0.000549059	-0.00126119	0.00186712	0.00164125	-0.0040768	-0.00276912
	U_maritimus	91	Ursidae	0.131547	-0.0156363	0.0011895	-0.0313771	-0.00789799	0.00690444	-0.00801293	0.0038281	0.0256629	0.00406665	-0.00622429	-0.00329979	-0.00622754	0.003776	-0.0106513	-0.000870687	0.00110166	-0.00215776	-0.00549759	0.00718038	0.00644741	0.00320648	-0.00280437	0.00378096	0.000541051	-0.00417643	-0.00351663	0.00219767	-0.00151562	-0.00108954	-0.00189523	0.00261178	-0.00736109	-0.00644036	0.00163666	-0.000702524	0.00174356	0.00128393	-0.00207577	-0.00346866	0.000670742
	U_maritimus	92	Ursidae	0.100031	-0.00066723	-0.0290611	-0.000848644	0.00344023	-0.00491969	0.0182934	-0.00438814	0.00405874	-0.0140803	0.005209	-0.0137399	-0.00504342	-0.00397616	0.00861729	0.00211118	0.00568416	0.000141243	-0.000740581	0.00953199	0.00127503	-0.00744357	-0.00632521	-0.00174807	-0.00250147	-0.000666413	0.00388079	-0.00516043	-0.0058459	-0.000820421	0.000179986	-0.00256562	-0.00188073	0.000875904	0.00266898	-0.000241062	-0.00219884	-0.0023794	-0.00152693	0.000521044	0.00479337
	U_maritimus	93	Ursidae	0.103453	-0.0311708	0.00925823	-0.0111843	-0.0148425	0.00192779	0.0160637	-0.00286634	0.0178101	0.00212208	-0.00305774	-0.00617416	0.00472635	0.0123986	-0.00453056	-0.00808009	0.00544881	-0.00797768	-0.00883543	-0.00554019	0.0104108	-0.00373939	0.00222164	-0.00385722	0.00513744	-0.00446085	0.000454728	-0.00352951	0.00499757	0.00033166	0.00492422	-0.00790458	-0.00540918	0.00154523	0.000611059	-0.00117317	0.00148939	-0.00426891	8.34091e-05	-0.00245796	-0.00171302
	U_maritimus	94	Ursidae	0.101776	0.0060321	-0.0519872	-0.0167075	-0.0129265	-0.00119168	0.0151265	-0.00721021	0.0236013	0.00726577	-0.0111085	0.00574611	0.00764865	0.0024726	-0.00771809	-0.00758524	-0.0137512	0.00530568	0.00942154	0.00358949	-0.00400129	0.00126176	-0.00462493	0.0028716	0.00564738	0.00244799	0.00396278	-0.000474432	0.0071678	0.00130584	0.00249377	0.00254322	0.00481947	-0.0089396	0.000921142	-0.00257773	0.00163195	0.0026897	0.00156463	-0.00211265	0.00272901
	U_maritimus	95	Ursidae	0.112326	-0.0255589	-0.00502258	-0.0128705	0.00858741	0.00691002	-0.00914422	0.00349992	0.0256886	0.00744136	-0.00361434	-0.0063905	0.00787912	-0.0103079	1.34503e-05	-0.0119231	-0.0122268	-0.0129951	-0.0100166	0.00142383	0.0012103	-0.00391942	0.00520608	-0.00608991	0.00347201	-0.007801	-0.00800279	0.00319004	-0.00417923	0.00150181	-0.00259864	-0.00494515	0.00566902	0.00135464	0.00101539	0.00301451	-0.00186796	0.000462986	-0.00188097	5.54523e-07	0.000556296
	U_maritimus	96	Ursidae	0.0623057	-0.0198658	-0.00542587	0.0015375	0.0133848	0.016271	0.0195454	-0.0165334	-0.00289586	0.000988584	0.0022626	0.0118124	0.0182593	-0.00818599	-0.0114847	-0.00690518	0.0146879	0.00183134	0.00651927	-0.00948019	0.00170635	-0.00116445	-0.0108283	-0.00092022	-0.00438053	-0.00491697	-0.00877291	-0.00538243	-0.00154071	-0.00211088	0.00206349	0.00532991	0.0045704	3.99682e-05	-0.00045966	-0.00248569	0.000917785	-0.00905203	-0.0017968	0.00466176	0.000569993
	U_maritimus	97	Ursidae	0.0648665	0.0147428	0.0047738	0.00776795	-0.0128074	0.0139863	0.0105845	0.00188308	0.017391	0.000194406	0.000170697	-0.0224588	0.00339473	-0.0153525	-0.00854271	-0.00236272	0.0186885	-0.0080487	0.00529205	-0.00617838	0.00208723	-0.00202857	0.00013582	-0.00164431	-0.00235436	0.00641603	-0.0060876	0.00318685	-0.000879208	-0.00125914	-0.00932367	-0.00865756	0.00550758	-0.00147083	-0.00295883	-0.00178984	0.000614946	-0.000297393	-0.000209158	0.00207079	0.00271007
	U_maritimus	100	Ursidae	0.145236	-0.0354249	-0.00426582	-0.0128942	-0.0156239	0.00687197	0.00532035	-0.00959366	0.0185635	0.00869784	-0.000438837	0.00617421	0.00798545	-0.00267667	0.00736862	-0.00815514	-0.00680895	-0.00143817	0.00256841	-0.00541589	0.0103361	0.00964178	0.00113355	-0.00237303	0.000343137	-0.00703074	0.00577009	-0.00161622	-0.00170262	2.28301e-05	-0.00480526	0.00718465	-0.00594242	0.000987491	-0.00472886	0.00472005	-0.000963679	-0.00478272	-0.000945141	-0.00712982	-0.000325042
	U_maritimus	131	Ursidae	0.127665	-0.0325234	-0.0170024	-0.0209102	0.00736873	0.0149997	0.00852432	-0.0150071	0.00480118	-0.00499552	0.000653175	0.0111976	-0.00610932	-0.00362556	-0.00237748	0.00501944	-0.00844741	1.28861e-05	0.00572355	-0.00189636	-0.00572316	0.00153192	0.00497255	0.000374874	-0.00453164	0.00573726	1.77584e-05	0.00091261	-0.00275378	0.000953511	-0.0112088	0.00974527	0.000386249	0.0096438	-0.00461423	-0.000385624	0.00722522	-0.00272408	-0.00141759	-0.000749177	0.00348194
	U_maritimus	132	Ursidae	0.128579	-0.0348628	-0.00121553	-0.0259768	-0.000872292	0.0115075	-0.00110287	-0.00840709	-0.0020311	-0.00312727	-0.0011347	-0.00414224	-0.00289336	-0.00521761	-0.00392462	-0.00884379	-0.0086413	-0.00602253	-0.00619281	-0.00729993	-0.00450661	-0.00558687	-0.00392367	-0.00132231	5.04021e-05	3.43773e-06	-0.00444164	-0.00784754	-0.00294457	0.00544827	0.00433938	-0.00278323	0.00128822	0.000760893	-0.000938677	0.0023907	-0.00191997	0.0032666	-0.000385437	-0.00231383	0.00315804
	U_maritimus	155	Ursidae	-0.0401914	0.0791623	0.0392259	-0.0183775	0.00986285	0.0157617	-0.0050336	0.0173466	0.0263737	0.0014364	-0.00667578	0.0184339	0.011428	0.000346675	-0.00288995	0.00782762	-0.00777338	0.0179691	0.00767497	-0.00201301	-0.00468875	0.00194371	-0.00376816	-0.000574626	0.00420703	0.00209	0.000523098	-0.00136423	-0.00126117	0.00426711	-0.00201594	-0.00179513	-0.00462645	0.00741918	0.000357302	5.82984e-05	-0.00467888	-0.00142114	0.00160829	-0.00086057	0.000138805
	U_maritimus	162	Ursidae	0.106732	-0.00746317	-0.00741915	-0.0403093	-0.000284718	0.00271886	-0.00592596	0.00286282	0.0163419	-0.00732495	0.00207809	0.00772418	-0.00535482	-0.00592049	-0.00920519	0.00254345	-0.00251811	-0.0010519	0.00961205	-0.00203682	-0.00197027	0.00242903	-0.00847962	-0.00147108	-0.000629553	0.00536529	0.00875151	-0.0013577	0.000520642	0.00266316	-0.00265783	-0.00863875	-0.00161976	-0.000344632	0.00129481	0.00355893	-0.000355364	-0.00324314	0.00480929	0.00247391	-0.0026141
	U_maritimus	169	Ursidae	0.11832	-0.0371718	0.0176282	-0.0254316	0.0285471	0.0120608	0.00980224	0.0160835	-0.000584174	0.0077313	0.00653609	-0.00431522	-0.00592932	-0.00875051	-0.00279788	0.00807094	-0.0105415	-0.00135865	-0.0035793	0.000469302	0.000750244	-3.38793e-05	-0.00672261	-0.00291109	0.0102888	0.000287478	0.0057242	0.00488304	0.0026961	0.000421714	-0.00149634	0.000647042	0.00151095	-0.00154602	0.00248076	-0.000856362	-0.00454688	-0.0055594	-0.00353278	-0.0018934	-0.00177258
	U_thibetanus	21	Ursidae	0.0051754	-0.0171179	0.0139523	-0.00357947	-0.00701451	0.00570185	0.00549085	-0.000483069	-0.0064195	-0.0114964	-0.00252798	0.00955857	0.00155363	0.00120154	0.00935446	-0.00300683	-0.0140728	0.004789	0.0030147	0.00691746	-0.00114693	0.00133419	-0.00117538	0.00211675	0.00502833	0.00130984	0.00265945	-0.0042732	0.00509589	0.00450823	-0.0025692	0.00331025	0.0021111	0.00271204	0.00353821	-0.000350978	-0.000922644	0.00142856	0.00201943	0.00266645	-0.00182468
	U_thibetanus	35	Ursidae	-0.0164322	0.033789	0.0124628	0.00547655	-0.00397847	0.0303539	0.00300789	-0.00668275	0.016984	-0.0109128	-0.0210849	0.0036211	-0.00582747	-0.0135143	-0.00656597	-0.00171501	-0.0142924	-0.0056677	0.00900992	0.00157465	0.00132303	0.00349836	-0.00531234	-0.00306659	-0.00275642	-0.00228078	0.000781403	-0.00132082	-0.00373498	-0.00146372	-0.00453004	0.000737547	-0.000415162	-0.0118418	-0.00419765	0.000682873	-0.00285252	0.00331887	0.000503247	0.0024379	-0.00251982
	U_thibetanus	53	Ursidae	-0.0211442	0.0429405	-0.0463842	-0.00918582	0.0164797	0.00470985	0.00477559	0.0157149	-0.00960028	0.00138172	0.00166923	0.0178319	-0.0124545	0.00557853	-0.00409857	0.0039881	0.00258496	-0.0023157	0.00713048	-0.00706763	0.00596759	-0.0186352	-0.00263689	0.00413976	-0.00640626	-0.00505115	-0.00532544	-0.000593841	-0.000917866	0.00797302	-0.00199345	0.000834205	0.00227667	-0.00381931	1.81765e-06	-0.00592038	-0.00133955	-0.000782142	0.0031636	0.00246747	-0.00125064
	U_thibetanus	77	Ursidae	-0.00285826	0.0129805	0.0144563	0.00581176	0.0122355	-0.0137986	-0.00126062	-0.0187484	-0.00840949	-0.0239197	0.00357661	0.00442853	-0.00624089	0.00753516	-0.00213516	-0.00655947	0.00643039	-0.00135999	0.000662283	0.00144257	0.000849376	0.00114561	-0.00327992	-3.81317e-05	0.0125265	0.0109839	-0.00387078	-0.00134319	0.00542882	0.00145428	0.00763294	-0.00542546	-0.00414868	0.00435372	-0.00166372	0.00668116	0.000394601	-0.0002999	-0.00663787	0.00119667	-0.000951411
	U_thibetanus	79	Ursidae	-0.0310559	0.0364762	0.0188089	0.0291683	-0.0343444	0.0422146	-0.00656618	0.00624456	-0.00806247	-0.0192457	0.00770442	-0.000764144	-0.0080064	-0.00378575	0.00904628	-0.016933	0.00389836	0.00653153	0.00347064	0.00416266	0.00402028	-0.00471466	-0.00797191	-0.000293559	0.00372452	-0.00574385	0.0047982	-0.00281834	-0.00308011	0.0030536	-0.000140616	-0.000948463	0.00654605	0.00072976	0.00182878	0.00308442	-0.000122165	0.0036652	0.000874448	-0.00632125	0.00137249
	U_thibetanus	80	Ursidae	-0.0345732	0.04115	0.0192092	0.0297116	-0.0281405	0.0387867	-0.000981154	0.00705571	-0.00973143	-0.0164127	0.00862309	-0.00255511	-0.00659328	-0.00223431	0.00956086	-0.0117639	0.00534988	-0.00367645	0.0043574	0.00451198	0.00371535	-0.00135823	-0.00348408	0.00313011	0.00338301	-0.00258888	0.000995773	-0.00656694	0.002975	0.00322399	0.000483869	-0.0022856	0.00222076	-0.000613829	-0.00361404	-0.000720235	0.00120389	-0.00134073	-0.00237007	-0.00551277	0.00166397
	U_thibetanus	88	Ursidae	-0.0307048	0.0789153	-0.0230893	0.004328	0.0184311	-0.0286713	-0.00927595	-0.0242241	0.00746862	0.00482987	0.00794267	-0.00124511	-0.0115413	0.000408563	0.0107681	-0.00543336	0.00732974	-0.00645467	-0.00348038	0.00760195	-0.00254004	0.00403867	0.0115041	-0.00171021	0.00221124	-0.00482236	-0.00662522	0.0111413	0.00325111	-0.00490923	-0.00333775	0.000726923	0.00743105	0.00255005	-0.000318757	-0.000416186	-0.00238699	2.2254e-05	-0.00103043	-0.0018634	0.0010152
	U_thibetanus	102	Ursidae	-0.00780154	0.00601443	0.00519809	0.0235463	0.00167574	-0.00505426	-0.035959	0.000313242	-9.20608e-06	0.00619591	8.88238e-05	-0.00256943	0.000296239	-0.00831814	0.0160701	0.00653181	-0.00548579	0.0101343	0.00216703	-0.00703888	0.0026278	-0.00433242	-0.00168597	-0.00190457	0.00403944	-6.12321e-05	0.000395686	0.00633016	0.00226123	-0.000110645	0.00414199	0.00378352	0.00124001	0.000232658	0.00512442	-0.00118587	-0.00397174	0.000446408	0.000533528	-0.000942286	-0.000649394
	U_thibetanus	103	Ursidae	-0.00485733	-0.0763827	0.0592927	-0.00119199	0.00796386	0.000985863	-0.0166946	-0.00886389	-0.0157317	-0.0277407	0.00081963	-0.00483175	-0.0104206	-0.0046289	0.0133519	0.000705163	-0.00213032	0.00495221	-0.00404759	-0.00643062	-0.00672584	0.0107182	-0.00243931	-0.0117368	0.00635721	-0.000689102	-0.00291502	0.0010085	0.000578985	-0.00584758	0.00767945	-0.00117444	0.00236232	0.00231682	-0.00336059	-0.00210502	0.00260485	0.000829617	0.00205112	-0.000752395	-0.00132167
	U_thibetanus	134	Ursidae	0.0258414	0.0264022	-0.0531468	-0.00927936	-0.00724515	-0.0131143	-0.0215491	0.00425353	-0.0199651	-0.0112455	0.001267	-0.00586433	0.0101314	-0.0196525	0.00794228	-0.00384252	-0.00664711	-0.00115506	0.00803099	-0.00651141	0.0107639	-0.00137287	-0.000320448	-0.00420207	-0.00831759	-0.00750215	0.0023629	-0.00267637	-0.000650637	0.00275629	-0.00249673	-0.00336916	-0.00198149	-0.00154233	0.00326537	0.00470525	-0.00266979	-0.00256204	0.00357561	0.00580153	-0.000106733
	U_thibetanus	143	Ursidae	-0.0529291	0.0358575	-0.0277788	0.0119686	-0.00753451	-0.00905947	-0.00058279	-0.0323743	-0.00528691	-0.00722586	-0.0106911	0.0188074	0.0082995	-0.0135512	-0.015002	-0.0054119	-0.000222194	0.00145799	-0.00577389	0.00357301	-0.0220319	-0.00784776	-0.000915358	0.0063247	0.00511872	0.00316789	-0.00589252	-0.00516849	-0.0111249	-0.00255374	0.0112875	-0.00232421	-0.00359593	-0.0067821	0.00968571	-0.00700591	-0.00236246	-0.0044223	0.00168499	0.00161472	0.0053471
	U_thibetanus	144	Ursidae	-0.0229723	0.0211094	-0.009755	-0.00054479	-0.0410265	-0.0260525	0.00348146	-0.0108841	0.00758476	0.0101844	0.0183909	0.00439901	-0.0101941	0.00905461	0.00221716	-0.00289624	-0.00732117	-0.00365821	0.00525971	0.00631033	-0.000677025	0.000994761	-0.00215624	0.0016995	-0.000392626	0.00127317	0.00426491	-0.00160216	0.00224477	0.00345075	0.000377858	-0.00406412	-0.00168989	-0.000476381	-0.00139887	0.00159786	-0.000810113	-0.00201162	-0.00201	0.00131632	0.000108162
	U_thibetanus	145	Ursidae	-0.0176561	0.0201968	-0.0101262	-0.00223527	-0.0418604	-0.0290446	0.00345822	-0.00779493	0.00705347	0.00584906	0.0236327	0.00149395	-0.00753183	0.00725901	0.00354621	-0.00527777	-0.00499323	-0.00260091	0.00400028	0.00744192	-0.0050842	0.000948039	0.00242799	-0.00190556	-0.00250249	-0.000875235	0.00540715	-0.00417266	-0.000105898	0.00284437	0.00166331	-0.00539824	0.00254842	0.000251926	-0.00149216	0.00213798	-0.00138189	-0.000508745	-0.00255756	0.000414881	-0.0007278
	U_thibetanus	33	Ursidae	0.0294803	-0.0267078	0.0325565	0.00636714	0.00404175	-0.0322377	0.00975795	0.000367184	-0.000892615	-0.0110238	-0.0103425	-0.00440431	-0.00314628	0.00699471	-0.000478383	-0.00779564	0.00778428	0.000487136	0.00181779	-0.00764569	0.00286298	-0.0100548	0.00848961	-0.000131568	0.000338733	0.00560648	-0.00923354	-0.0100542	-0.00115954	-0.00470003	-0.00557129	-0.00238815	-4.91574e-05	-0.00634587	-0.00261607	-0.00396559	0.00098871	-0.00297915	0.00331245	0.000985733	-0.0026372
	U_thibetanus	72	Ursidae	-0.0118096	0.0147382	-0.00114487	0.00680929	0.00110566	0.0203933	0.013727	-0.0135168	-0.00868861	-0.00485211	-0.011016	0.0136994	-0.0117505	-0.016561	0.00615115	0.00401432	-0.00796536	0.0106496	0.00334274	-0.000637518	-0.0013234	-0.00694682	0.011194	-0.000311158	-0.00196383	0.000528673	-0.00202187	0.000948728	-0.00263078	-0.00430069	0.000748482	-0.00473719	0.00611722	0.000168101	-0.00298281	0.00649702	-0.00136869	0.00228965	-0.000676245	0.00301734	-0.00141064
	U_thibetanus	86	Ursidae	-0.0248836	-0.02143	0.0240038	-0.0124677	0.00620745	0.000748886	-0.0203224	0.011801	0.0272266	-0.0137235	0.000688612	0.0176258	-0.011731	0.006271	-0.00436617	-0.00468474	0.00368469	0.000754115	-0.00299029	-0.00210151	-0.0187142	0.0087195	0.00285232	0.00277653	-0.00740054	0.00972748	0.00361056	-0.00250133	-0.00183668	0.00636615	0.00264884	5.13697e-05	-0.00422539	-0.0034865	0.00352758	-0.00109696	-0.00127442	-0.00182839	-0.00316578	0.00223694	-0.00246872
	U_thibetanus	98	Ursidae	0.00285054	0.0319286	0.022312	0.00353766	-0.00266816	-0.017942	0.00999794	0.011524	0.0269903	-0.0185613	0.0164626	-0.00769808	-0.0191962	0.00206279	-0.0143377	0.000431747	-0.0118327	-0.00448092	-0.00936683	-0.0117837	-0.00862298	-0.00387505	-0.0145407	-0.00248231	0.000410193	-0.00931778	-0.00189276	0.00459636	0.000227709	0.00304247	-0.00472123	0.0104037	0.000551442	-0.00266609	0.00321544	0.000169089	0.00146307	0.00326242	0.00241968	0.00263789	-0.000946711
	U_thibetanus	101	Ursidae	-0.00497403	-0.00482934	0.0237231	-0.00977576	-0.0135933	-0.00958944	-0.00173868	0.0250532	0.0120916	-0.0135532	-0.00340104	-0.0114903	-0.00490575	0.00647874	-0.00931881	-0.00408349	0.00118016	-0.00992681	-0.00220074	0.00943533	-0.00383065	-0.00392451	0.0115468	0.00475212	-0.000574459	-0.000758446	-0.00294703	0.00771802	-0.000710891	0.000514809	-0.00900188	-0.000881095	-0.00266284	-0.00585687	0.00284167	-0.00060514	-6.16782e-05	0.000209817	-0.000238891	0.00574888	0.000538962
	U_thibetanus	142	Ursidae	0.00544098	0.0267832	-0.028999	0.00222849	-0.0112327	0.0144596	-0.0286394	-0.00380657	-0.00694959	0.0191411	-0.00456305	0.0216809	0.00441285	-0.00645893	0.0125393	0.00265702	-0.00313897	-0.00734011	-0.00178694	0.000838458	-0.00350154	5.23154e-05	-0.00141709	0.00794386	-0.002151	0.000475422	-0.00292591	-0.000545571	-0.0057688	0.00583012	-0.0013989	0.005019	0.00350678	-0.000980173	0.00311758	-0.000644233	0.00387073	-0.00289792	-0.00209721	-0.00223052	-0.00295011
	U_thibetanus	146	Ursidae	-0.0245378	0.0191393	-0.0107513	-0.000434243	-0.042248	-0.0247992	0.00330382	-0.00991686	0.00486958	0.00794079	0.0205359	0.00415122	-0.0104526	0.00556816	0.00605512	-0.00387487	-0.00495381	-0.00102974	0.00318704	0.00923088	-0.000393685	0.000907428	-0.000160578	0.00152746	-0.00097702	-0.00253376	0.00369865	-0.0023671	0.00122401	0.00353287	-0.0017051	-0.000665881	-0.000217609	-0.00142536	-0.00337584	0.0040979	-0.00305481	0.00228698	0.00206122	0.00184184	9.84442e-05
	U_thibetanus	147	Ursidae	-0.028176	0.0206366	-0.0111304	0.00158978	-0.0447386	-0.0250366	0.0053535	-0.00664241	0.00753218	0.00572635	0.0209178	0.00140667	-0.0105363	0.00996514	0.0054501	-0.00449484	-0.0037	-0.00322207	0.00631764	0.00605158	-0.00086954	0.00275214	-0.000707069	0.00176905	-0.000945831	0.000148507	0.0053638	-0.00535333	0.00173929	0.00556541	-0.000282918	-0.000830775	-0.00302004	0.00215821	-0.00129396	0.00195391	3.68277e-05	0.000206628	-0.00171556	0.000172329	0.000232598
	U_thibetanus	167	Ursidae	0.00964749	0.0175931	-0.00870422	0.0109734	-3.00445e-05	-0.0138743	0.00205836	-0.0182124	0.00696253	-0.024377	-0.00806392	0.00549584	-0.0158875	0.00225074	-0.0040109	0.0130482	0.00885267	0.0039926	0.00441628	0.00922461	0.0180875	0.00203578	0.00588225	-0.00894613	0.00803752	-0.00651824	0.0039519	0.0119169	-0.0131463	0.00245201	-0.00550896	0.0068328	-0.00608995	2.66742e-05	0.00226523	-0.0049882	0.00108502	0.00312022	-0.00523704	0.000817332	0.00221192
